1

2

3 **Network topology and evolution of the gene co-expression of T-cells during**  
4 **immuno-senescence**

5

6 Megan L. Mair<sup>1</sup> ¶, Nicolas Tchitcheck, Tarynn M. Witten<sup>\*¶2</sup>, Véronique Thomas-Vaslin<sup>3</sup>

7

8 <sup>1</sup> Virginia Commonwealth University, Center for the Study of Biological Complexity

9 <sup>2</sup> Department of Computer Science

10 US-VA 23284-2030 Richmond, United States

11 <sup>3</sup> Sorbonne Université, INSERM, Immunology, Immunopathology, Immunotherapies,

12 UMRS959, F-75013 Paris, France

13

14 \* Corresponding Author Address: Prof. Tarynn M. Witten, Dept. of Computer Science, Room  
15 E4225, College of Engineering, Virginia Commonwealth University, Richmond, VA 23284-3019.

16 Corresponding Author Email: [tmwitten@vcu.edu](mailto:tmwitten@vcu.edu)

17

18

19 ¶ These authors contributed equally to this work

20

## 21 **Abstract**

22           To better understand the potential impact of the gene expression network structure on the  
23 dynamics of immune-senescence and defects of cell functions during aging, we investigated  
24 network structures in both young and old individuals. We analyzed the gene co-expression  
25 networks (GCNs) derived from an aging signature of 130 immune-related genes obtained from  
26 CD3<sup>+</sup> T-cell splenocytes extracted from FVB/N, C57BL/6N, and BALB/c mice at ages 2 and 22-  
27 24 months. The network structure for the two different mouse age-groups was derived and  
28 subsequently analyzed. Analysis of network hubs using clustering coefficients, degree,  
29 betweenness, eigenvector, and closeness centralities, as well as local, indirect, and total influence  
30 measures, demonstrated changes in gene behavior and network control between the two age  
31 groups. Our quantification shows that the young, 2-month old mouse network is more organized  
32 than the 22-24-month, old mouse network, while the network structure of the older mouse GCN  
33 appears to be far more complicated but far more dispersed. Changes in network structure between  
34 the old and young mice suggest deterioration in transcription regulation with age in peripheral T-  
35 cells, particularly within the TCR signaling pathway, and potential compensatory mechanisms in  
36 older T-cells to overcome loss to regular function resulting from transcriptional irregularity. These  
37 results demonstrate the need for more research into gene co-expression in peripheral T-cells in  
38 order to better understand both network irregularities and the phenotypic dysfunction observed in  
39 older individuals.

40

## 41 **Author Summary**

42 In order to better understand the potential mechanisms of transcriptional irregularities in the  
43 immune system with aging, we analyzed the structure of gene co-expression networks of T-cells  
44 extracted from the spleens of 2 and 22-24-month old mice. Gene co-expression describes the  
45 correlation relationship between two expressed genes; as the expression of one gene goes up, the  
46 expression of another gene might also increase (or, conversely, decrease). Strong gene co-  
47 expression relationships can signal the existence of a number of important biological phenomena,  
48 such as two genes belonging to a transcription pathway or protein structure. Network diagrams  
49 visualizing these co-expression relationships in both younger and older mice demonstrated the  
50 existence of differences in network structure and properties that may be attributed to the aging of  
51 the immune system. Network mathematical methods were used to examine the complexity of each  
52 network. We found that the younger mouse network was more organized than the older mouse  
53 network. The older mouse group exhibited a 255% increase in co-expression relationships but a  
54 decrease of 92% of the connections from the young mouse network. This suggests the older mouse  
55 T-cells suffer dysfunction at a transcriptional level. This results in the loss of regular immune and  
56 cellular functions. These results demonstrate the importance of future research into gene co-  
57 expression to decipher senescence or diseases that perturb gene expression through time.

58

## 59 **Introduction**

60 Aging is a natural process that progressively alters biological cell functions at the  
61 microscopic level with cell senescence, and extends up to the organ level and overall function of  
62 the organism, leading to complex disorganization at various scales in living systems [1]. The  
63 network connectivity between the nodes composing the multi-level hierarchical network of

64 “aging” could thus be altered at various biological levels. This could lead to rupture of stability  
65 and robustness of dynamic interweaved networks with age.

66 At the mesoscopic level, the population of individuals aged 65 and over is increasing [2].  
67 The economic and biomedical influence of the elderly population will have a significant impact  
68 upon the global economy [3-5]. Chronic inflammation and susceptibility to infection are traits of  
69 immuno-senescence, the term used to describe the overall age-related changes of the immune  
70 system [6-10]. Immune dysfunction in the elderly contributes to increased susceptibility to  
71 infection and inflammation [11-13]. Immuno-senescence can have a negative impact on health  
72 outcomes including morbidity and mortality in older adults [6, 10-18]. This was recently  
73 underlined with the Covid-19 pandemic, where older individual were more susceptible to severe  
74 disease and mortality [19].

75 Aging is often characterized by perturbations and/or remodeling of the T-lymphocyte  
76 system [20-23]. Aging contributes to the decrease of naïve T-cell production [24], first by thymic  
77 involution starting at puberty. These perturbations of production are then compensated by  
78 increasing the selection and the proliferation of effector/memory T lymphocytes populations,  
79 which were previously exposed to an antigen. As the organism ages, the accumulated  
80 effector/memory cells often become senescent non-functional T-cells. These fill the  
81 “immunological space,” replacing the decreasing population diversity of naïve cells, which are  
82 able to recognize and combat sources of new antigens.

83 Immuno-senescence also affects mice; mice are thus a good model to study the dynamics  
84 of T lymphocyte aging through micro (cells) and macro (tissues/organs) levels. Mice have  
85 previously been used to demonstrate other changes in T lymphocyte biology in the context of  
86 aging. For example, partial clonal deletion is known to occur in the spleen in old mice. Previously,

87 Thomas-Vaslin *et al.* quantified the heterogeneity of T-cell population proportions based on their  
88 proliferation rates, according to various mice genetic origins [25]. This revealed decreased  
89 proliferative and renewal capacities of T-cells with aging. These selection processes also result in  
90 a diminished T-cell receptor (TCR) repertoire biodiversity, required for the recognition of new  
91 antigens [23]. Thomas-Vaslin *et al.* have additionally demonstrated that T-cell homeostasis is  
92 maintained in young mice after a transient perturbation [26], with a biodiversified repertoire.  
93 However, at mid-life the immuno-senescence decreases the turnover and proliferation of naive T-  
94 cells with new TCRs, while memory T-cells and oligoclonal expansion accumulates. The  
95 consequences of the natural immunodepression during aging could be exacerbated by the effects  
96 of transient perturbations such as immunosuppressive treatments which kill dividing cells, like  
97 chemotherapy [25]. Most immunopathologies in humans also drive oligoclonal expansions of T-  
98 cells [27].

99         These observations suggest that the T-cell dynamic network interactions and regulation  
100 processes could be influenced by age. Our hypothesis is that responses to molecular perturbations,  
101 from the level of gene transcription, is optimized in the T-cells of young mice, and that this robust  
102 response is diminished in old mice.

103         Understanding the complexity of gene expression and cell pathways can be approached  
104 through the analysis of network gene co-expression relationships [28]. Gene co-expression  
105 networks have been used to study the biology of organisms such as plants, mice, and humans [29-  
106 31]. Gene co-expression describes simple correlation relationships between the expression levels  
107 of two genes. For example, as the expression of one gene increases, a given gene might have a  
108 strong positive or negative correlation with the expression of a second gene. Strong gene co-  
109 expression relationships correlate with a number of intracellular biological processes, including

110 transcription pathways, protein complex formation and cell signaling. Changes in co-expression  
111 relationships and subsequent network topology can therefore provide insight into altered biological  
112 pathways, for instance, in the contexts of disease or aging [28, 32-33]. Gene co-expression analysis  
113 through network structures can begin to provide a more holistic view of biological processes  
114 related to gene expression, allowing for the detection of changes not otherwise evident in simple  
115 gene expression data.

116 In order to understand these more complicated interactions, mathematical, bioinformatics  
117 and computational methods may be brought to bear. Among the system-level tools in these fields  
118 are those of network analysis. There are already a number of historical research papers that have  
119 applied network analysis techniques to studying various aging processes and variation of  
120 connectivity during aging of various species [34-45], up to the theory of aging networks. Network  
121 comparison techniques allow for the detection of potential differences in gene co-expression across  
122 a variety of biological conditions, including possible age-related changes in gene co-expression.

123 In this paper, we present an analysis of aging-related, dynamical transcription modification  
124 using gene co-expression data derived from peripheral T-cells from both young (2 months old)  
125 and old mice (22/24-months old). These gene co-expression networks were derived from a shared  
126 signature of 130 immune-related genes obtained from CD3+ splenocytes extracted from mice  
127 strains that display genetic variability (FVB/N, C57BL/6N, and BALB/c) [46]. We applied a  
128 number of network analysis methods to determine the existence of optimal network capacities and  
129 connectivity in young mice. We then investigated the age-related changes in network properties  
130 and structures by analyzing the loss of gene co-expression and the newly gained gene co-  
131 expression relationships in the older mouse network. We discuss how these changes may be

132 associated with mouse species immuno-senescence, and how these changes might give insights  
133 into the aging of the human immune system.

134

## 135 **Results**

### 136 **General terminology of structure of gene co-expression networks**

137 We investigate here the topology and evolution of gene co-expression networks (GCN),  
138 across young and old mice, tracking the lost and gained gene co-expressions and the resulting  
139 remodeling of the structure of the networks that could influence the possible  
140 robustness/efficacy/resilience of the adaptive immune cells. For the purposes of our upcoming  
141 discussion, a node/vertex/hub means a gene that is expressed as an mRNA and an edge means that  
142 there is a single link, undirected, between two expressed genes in the network (*i.e.*, there exists a  
143 strong correlation between the expression of the two linked genes). A reference for important  
144 network terminology can be found in Table 1, and important concepts are illustrated in Fig 1.

145 **Table 1. Table of network terminology.**

| <b>Term</b>                   | <b>Definition for gene co-expression network (GCN)</b>                                                                                                                    |
|-------------------------------|---------------------------------------------------------------------------------------------------------------------------------------------------------------------------|
| <b>Node/Vertex/Hub</b>        | Gene that is expressed as an mRNA represented in the network                                                                                                              |
| <b>Edge</b>                   | A link, undirected, between two expressed genes in the network, indicating a co-expression relationship between the mRNA                                                  |
| <b>Degree centrality</b>      | Centrality measure denoted by the number of edges directly attached to a node                                                                                             |
| <b>Eigenvector centrality</b> | Measure of influence of a given node in a network. A higher eigenvector centrality score means a node is connected to many other nodes with eigenvector centrality scores |
| <b>Closeness centrality</b>   | Measure of how close an individual node is to other nodes in the network                                                                                                  |
| <b>Betweenness centrality</b> | Measure of control a node has over a network based on how a node connects and stands between other nodes                                                                  |
| <b>Eccentricity</b>           | The maximum distance between a node and all other nodes                                                                                                                   |
| <b>Stress</b>                 | The number of shortest paths passing through a given node, indicates the importance of a node holding together a network                                                  |
| <b>Weiner index</b>           | Sum of all the shortest paths in the network                                                                                                                              |
| <b>Local influence</b>        | The influence a node has over its directly connected, one-hop neighbors                                                                                                   |
| <b>Indirect influence</b>     | The influence a node has on its two-hop neighbors                                                                                                                         |
| <b>Total influence</b>        | Weighted sum of direct and indirect influence                                                                                                                             |
| <b>Clustering coefficient</b> | Measure of degree to which nodes cluster around a given node in the network                                                                                               |



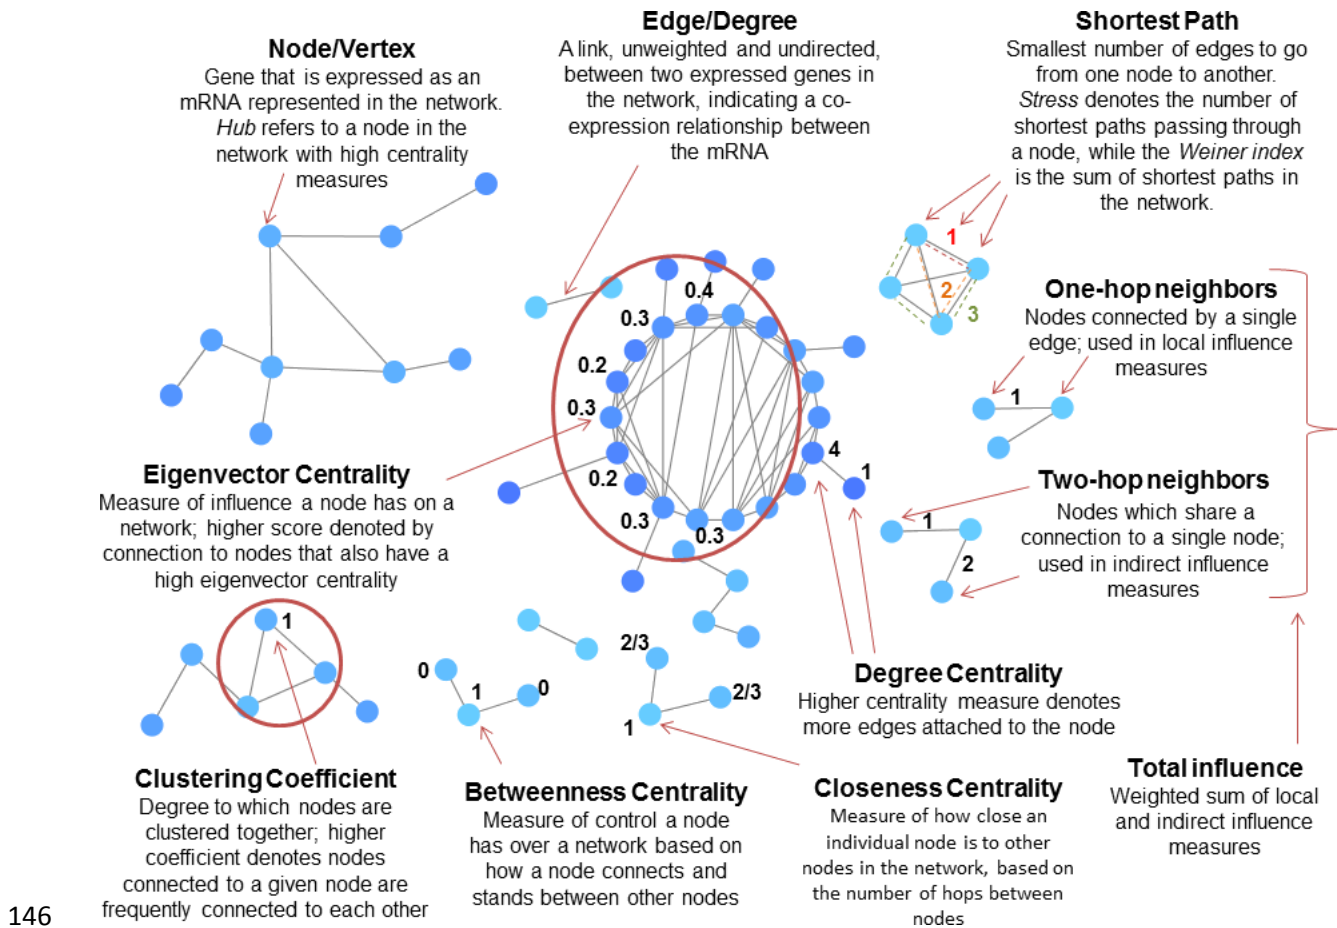

146

147 **Figure 1. Diagram illustrative of key network terminology.** Terminology used in this paper is  
148 important for the discussion of Gene Co-expression Networks (GCNs).

149

150 **Ageing signature and hierarchical clustering of mice according to gene expression in splenic**  
151 **T-cells.**

152 To decipher gene expression modifications across aging, we performed a transcriptomic  
153 profiling of CD3<sup>+</sup> purified splenocytes from 12 young mice age 2 months and from 11 old mice  
154 ages 22-24 months. The ICA/GSEA method was used to identify a signature of 130 genes able to  
155 distinguish young from old mice. Interestingly, the age-related gene signature allows us to

156 segregate the 3 mice strains, considering only the young mice. However, this signature cannot  
157 separate the mice according to the genetic origin of old individuals due to the high variation of  
158 gene expression (S1 Figure). This suggests a precise synchronization and organization of gene  
159 expression in development that could vary according to genetic origins, allowing for the optimal  
160 functionality of T-cells in young mice. However, a disorganization of gene expression appears in  
161 old mice that could no longer maintain their individual genetic signature. This suggests an  
162 introduction of stochastic events in gene expression. To verify this hypothesis, we then proposed  
163 topological analysis of the gene-co-expression network.

#### 164 **General Network Structure of T-cell expression in the spleen of young and old mice**

165 To further understand the aging alterations that could impact T-cell functionality based on  
166 our gene signature, we generated two gene co-expression networks (GCN) based on the young and  
167 old aged mice. The network of young mice represent the optimal activity and functionality of the  
168 pool of all splenic T-cells, based on a consensus of expression data. The network of old mice  
169 represent the resilient T-cells that continue to live in the old mice, while the natural  
170 immunodepression has already removed more than 80% of naïve T-cells while favoring the  
171 proliferation and accumulation of effector/memory T-cells in the spleen [24-25]. Based on these  
172 two networks, we performed topological analyses to compare their structures and functionalities.  
173 We used various centrality network measurements applied to each GCN.

174 We first analyzed the structure of the gene co-expression network in young mice and  
175 compared it to the network structure of GCN belonging to old mice. Genes expression was detected  
176 with probes that cover messenger RNA from different genetic regions, including multiple probes  
177 that detect particular TCR proteins encoded from stochastic gene rearrangements of VDJ genes.  
178 The mRNA represented by each node is expected to give rise to the functional protein interactions

179 related to known intracellular pathways expressed in the sampled T-cells. S1 Table lists all of the  
180 gene transcripts found in both of the networks, along with known human orthologs and known  
181 gene functions. Network files featuring the genes that appear in each network, as well as their  
182 corresponding co-expression relationships, can be found in S2 Table (young mouse GCN) and S3  
183 Table (old mouse GCN).

#### 184 **Pathway Analysis: KEGG /REACTOME**

185 Genes appearing in the young and old mouse network were enriched in several  
186 immune system-related pathways; of the network genes contained in MSigDB, 33% in the young  
187 mouse network and 21% in the old mouse network were enriched for the REACTOME Immune  
188 System pathway. Despite having fewer nodes total, a higher percentage of genes in the young  
189 mouse network were enriched in KEGG and REACTOME immune system-related pathways  
190 compared to the older mouse network. Pathways unique to the young mouse GCN were genes  
191 involved in the translocation of ZAP-70 and the phosphorylation of CD3 and TCR zeta chains,  
192 which was significant at the 0.05 level. The old mouse GCN, on the other hand, had genes enriched  
193 for aldosterone-regulated sodium reabsorption and primary immunodeficiency, while the young  
194 mouse network did not. A complete summary of pathway enrichment results can be found in Fig  
195 2.

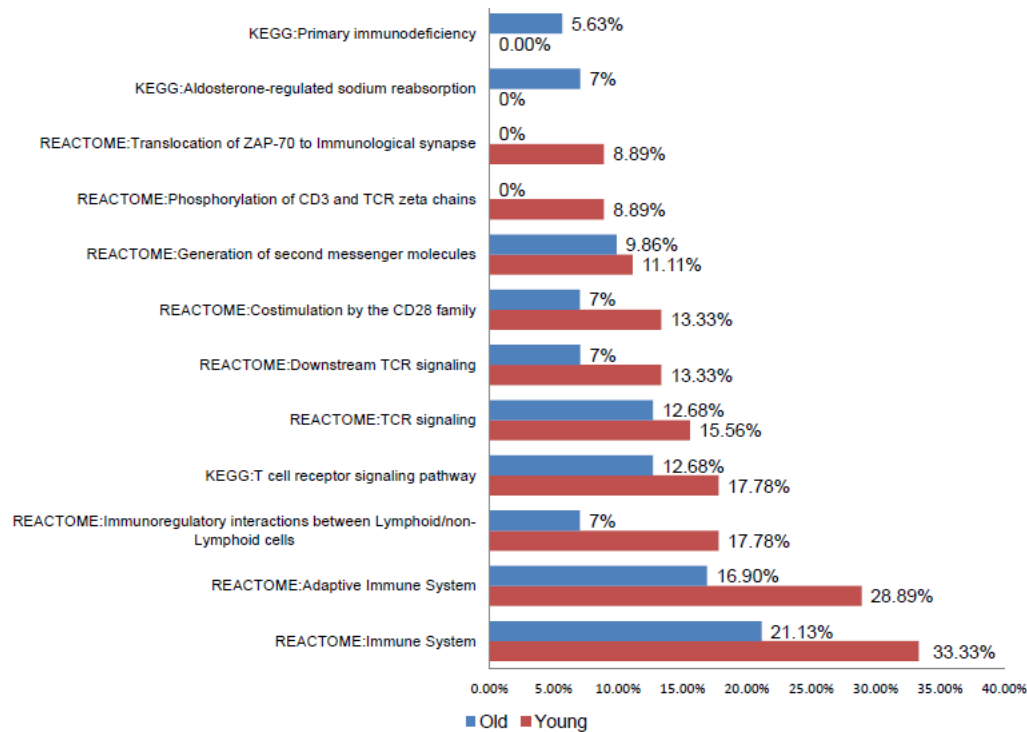

196

197 **Fig 2. KEGG and REACTOME Pathway Enrichment.** Percentage of genes enriched in each  
 198 pathway in the young (red) and old (blue) mouse GCNs. Only the difference between the  
 199 proportion of genes in the old and young networks enriched for involvement in the translocation  
 200 of ZAP-70 and the phosphorylation of CD3 and TCR zeta chains was significant at the 0.05 level.

201

## 202 **Structure of the network in young and old mice as number of nodes and edges**

203 The range of edges per node for the younger mouse GCN was 1-10 edges, with a mean  
 204 edge count of 2.656. For the older mouse GCN, the range of edges per node was 1-15 edges per  
 205 node with a mean degree count of 5.922 edges per node. For the 2-month old mouse GCN, the  
 206 average node degree count falls within the range typical of a biological network [47]. This is not  
 207 true for the 22/24-month old mouse network. A summary of some of these network differences

208 can be found in Table 2. A t-test demonstrated a statistically significant difference between the  
209 mean edge counts of the two age-groups ( $p < 0.001$ ).

210 **Table 2: Summary of basic network statistics for the 2 and 22-24 month-old networks.**

| Gene centrality measure     | 2-month<br>GCN | 22-24-month<br>GCN | Difference                             |
|-----------------------------|----------------|--------------------|----------------------------------------|
| Mean Edge Count             | 2.66           | 5.92               | Significantly different<br>$p < 0.001$ |
| Mean Shortest Path          | 2.05           | 3.39               | Significantly different<br>$p < 0.001$ |
| Mean Clustering Coefficient | 0.25           | 0.34               | Significantly different<br>$p < 0.05$  |
| Weiner Index                | 2206           | 76617              | N/A                                    |
| Network Diameter            | 7              | 12                 | N/A                                    |
| Core Network Radius         | 4              | 6                  | N/A                                    |

211

212 Network attributes were highly altered across the two age-related networks. The 2-month  
213 GCN had a total of 64 nodes with 78 unique edges, while the 22/24-month old GCN had 102  
214 nodes with 295 unique edges. A total of 53 nodes were found to be identical in both the 2-month  
215 and 22/24-month old networks. What is interesting is that despite this conservation of 53 nodes,  
216 only 7 edges are conserved across both networks. Table 3 lists the genes at the ends of each of  
217 the 7 edges. We highlighted these conserved edges in Fig 3. As we will later describe, the 7  
218 highlighted conserved pairs in Fig 3 are ranked first or second in nearly all of the network

219 centrality measures. Notably, most of the genes co-expressed and conserved between T-cells from  
220 young and old mice concern the TCR, which is required to receive signals from antigens and  
221 transduce signaling pathways to trigger various T-cell functions. However, the co-stimulation of  
222 the TCR involving CD28 and its downstream signaling [48] is disconnected from the core  
223 network gene expression in old mice, suggesting default of co-stimulation as in hallmark of  
224 senescent CD8 T-cells [49]. The overall network structure for both age-groups is summarized in  
225 an adjacency matrix in Fig 4.

226 **Table 3: List of the edges conserved between the young and old networks along with the**  
227 **genes (nodes) that the edges connect.**

| Edge number | Edges Conserved Across Networks |
|-------------|---------------------------------|
| 1           | Sema4f – LOC630408              |
| 2           | LOC386545 – Leprotl1            |
| 3           | Pik3r1 – Dgka                   |
| 4           | LOC100043969 – Cd28             |
| 5           | Tcrb-V8.2 – LOC100041103        |
| 6           | Tes – Lat                       |
| 7           | Xlr4c – LOC100046087            |

228

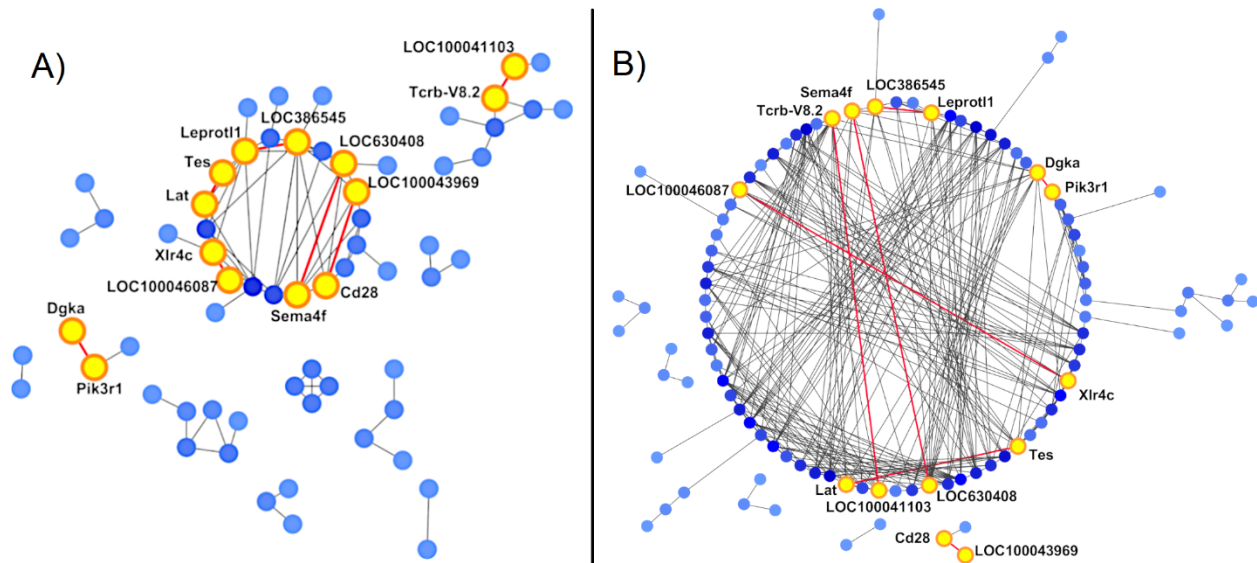

229  
230 **Fig 3. Network diagrams of gene co-expression with conserved edges between young and old**  
231 **splenic T-cells.** The Spearman rank correlation reveals the gene co-expression network according  
232 to age. Darker colored nodes correspond with a higher number of edges per node (up to 10 edges  
233 in the younger mouse network and 15 edges in the older mouse network). A) The GCN constructed  
234 based upon gene co-expression in CD3+ splenocytes from 2-month old mice (64 nodes and 85  
235 edges). B) The GCN constructed based on the old mouse data (102 nodes and 302 edges). The  
236 seven conserved edges between young (A) and old (B) mice are illustrated with the red lines. Node  
237 pairs at the ends of these edges are labeled and highlighted.





244           Consequentially, because only seven edges were conserved across the aging networks,  
245 most network edges were lost or gained with age. While the older mouse GCN saw an increase  
246 in total edges, 92% of the edges from the 2-month old GCN were not present in the 22/24-month  
247 old GCN, indicating 92% of the co-expression relationships established in young mice are absent  
248 in older mice. We identified 47 nodes present in the young network but whose co-expression  
249 relationships were lost with age in the senescent T-cells (Fig 5). Nodes in the older mouse GCN  
250 that gained new co-expression relationships not present in the younger mouse GCN can be viewed  
251 in Fig 6. Most of these genes with altered co-expression relationships encode for proteins involved  
252 in TCR/CD3 complex signaling and downstream signal transduction, such as the membrane  
253 receptor TCR alpha/beta chains, the CD3 complex (gamma, delta, epsilon CD3 chains),  
254 costimulation protein CD28, intracellular LCK, and Lat.

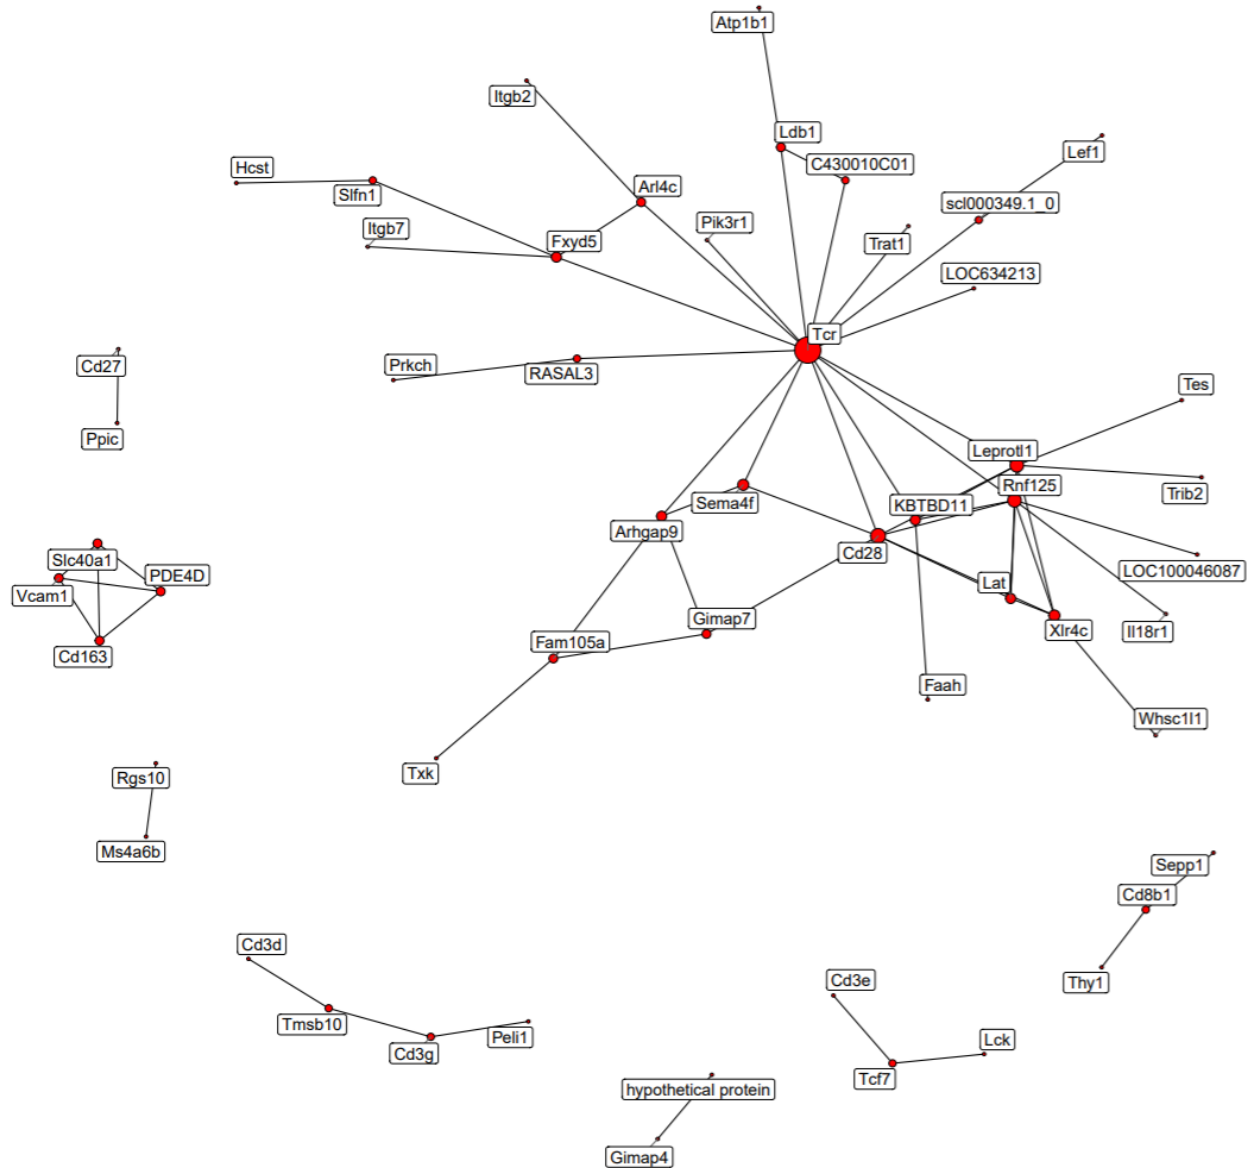

255

256 **Figure 5. Genes with co-expression relationships lost with age.** The young mouse GCN,  
257 containing only edges that are not in the 22/24-month old mouse network. TCR probes were  
258 merged into a single node to improve visibility.

259



268 of network centrality has a long history [50]. In general, network centrality speaks to the impact  
269 of a given node within a given network. A number of network centrality variables have been  
270 subsequently formulated and discussed in the literature. More recently, these methods were applied  
271 to the study of longevity-gene networks [35-38] as well as in a variety of other areas such as  
272 neurological mapping and social network analysis [51-57]. We begin with the concept of “degree  
273 centrality”.

274

275 **Degree centrality.** *Degree centrality* counts how many neighbors a node has. A node has a  
276 neighbor if there is an edge directly connecting the node of interest to any other network nodes  
277 [35-38]. This definition argues that a network node is important if there are many nodes that are  
278 directly connected to it. From this definition, it follows that the given network node can affect  
279 the network to a greater extent, given that it has a high degree centrality. Degree centrality is the  
280 simplest of the centrality measures.

281 Table 4 illustrates the top ten gene-transcripts with the highest degree centrality in both  
282 networks. Of immediate note is the fact that the two young and old T-cell gene co-expression  
283 networks have totally different degree centrality nodes in the top 10 gene list, with the exception  
284 of TCR subunit gene LOC630408. Most genes with the highest centrality, including LOC630408,  
285 are identified as T-cell receptor components, which are highly diverse in the original spleen sample  
286 (S1 Table). In 2-month mice the degree centrality of TCR related genes is 6-10, while for the  
287 22/24-month it doubles to 14 to 15, meaning that the TCR from senescent T-cells establish more  
288 links with other molecules. This suggests that the molecular relation is less specific (degeneracy),  
289 increasing the entropy of the system and decreasing the ordered organization established during  
290 development. Because degree centralities provide an overall view of the network connectivity, it

291 is reasonable to hypothesize the fact that the 22/24-month old network is three times larger than  
292 the 2-month old network. We do note that network size differences may contribute to some of the  
293 overall differences in degree centrality differences.

294 **Table 4: Top 10 highest degree centralities for the young and old mouse T-cell gene co-**  
295 **expression networks.**

| 2 month      | Degree     | 22-24 month   | Degree     |
|--------------|------------|---------------|------------|
| Genes        | Centrality | Genes         | Centrality |
| LOC386545    | 10         | A130082M07Rik | 15         |
| Leprotl1     | 9          | Lcp2          | 14         |
| Rnf125       | 8          | C030002B11Rik | 14         |
| LOC630408    | 7          | Spint2        | 14         |
| LOC100048845 | 6          | Tcrb-V8.2     | 14         |
| Sema4f       | 6          | Gtf2i         | 14         |
| LOC436541    | 6          | LOC630408     | 14         |
| Xlr4c        | 6          | Selplg        | 13         |
| Lat          | 5          | A130090K04Rik | 12         |
| LOC100043969 | 5          | Cd3d          | 12         |
|              |            | Fyb           | 12         |

296

Tes

12

297

---

298

299 **Eigenvector centrality.** *Eigenvector centrality* is another measure of the influence of a given  
300 node in a network. A high eigenvector centrality means that the given node is connected to many  
301 other nodes who themselves have high eigenvector centrality scores. You can think of this as  
302 follows: if a node is a big shot, then its high eigenvalue centrality provides a measure of how  
303 many other big shots is it connected to.

304 Table 5 lists the top 10 network nodes with respect to their eigenvalue centrality value.  
305 These genes represent the top 10 genes that are thought to exert general control over the whole  
306 network. It is straightforward to observe that the two GCNs showed clear differences in hub control  
307 dynamics as defined by eigenvector centrality values. We note that the values of the 2-month  
308 eigenvalue centralities are all greater than those in the 22/24-month network, meaning a more  
309 connected and organized network. Additionally, we note that the genes that control the 2-month  
310 network according to eigenvector centrality are entirely different from the older mouse network,  
311 save for TCR gene LOC630408, which also has a high degree centrality in both networks as  
312 reported in Table 4. Most of the transcripts with high eigenvector values in young mice are  
313 involved in the TCR and the CD28 co-receptor. Meanwhile, the highest ranked gene in the old  
314 mouse network is Lcp2, which encodes the adaptor protein SLP-76 that is a central figure in the  
315 TCR signaling pathway. Information regarding the other genes with high eigenvector centralities  
316 can be found in S1 Table.

317

318 **Table 5. Top 10 highest eigenvector centralities for the young and old mouse networks.**

| 2 month<br>Genes | Degree<br>Count | Eigenvector<br>Centrality | 22-24 month<br>Genes | Degree<br>Count | Eigenvector<br>Centrality |
|------------------|-----------------|---------------------------|----------------------|-----------------|---------------------------|
| LOC386545        | 10              | 0.40                      | Lcp2                 | 14              | 0.27                      |
| Leprotl1         | 9               | 0.34                      | Spint2               | 14              | 0.26                      |
| LOC436541        | 6               | 0.30                      | Selplg               | 13              | 0.26                      |
| LOC100048845     | 6               | 0.30                      | C030002B11Rik        | 14              | 0.25                      |
| Rnf125           | 8               | 0.29                      | A130090K04Rik        | 12              | 0.24                      |
| LOC630408        | 7               | 0.28                      | LOC630408            | 14              | 0.23                      |
| Sema4f           | 6               | 0.26                      | Spn                  | 11              | 0.21                      |
| LOC386513        | 4               | 0.23                      | A130082M07Rik        | 15              | 0.21                      |
| Xlr4c            | 6               | 0.22                      | Fyb                  | 12              | 0.20                      |
| LOC100043969     | 5               | 0.21                      | Igf2r                | 10              | 0.18                      |

319  
320 **Closeness centrality.** *Closeness centrality* is a measure of the degree to which an individual  
321 node is near to all of the other nodes in a network. In Table 6 we provide the closeness  
322 centralities for the top 10 genes in both networks. First, we note that there are no common genes  
323 across the two networks. However, the functionalities of certain high ranking genes are  
324 conserved across the networks. For example, the first rank gene in the 2-month network is gene  
325 LOC386545 which is similar to T-cell receptor beta chain VNDNJ precursor (S1 Table).  
326 Meanwhile first rank gene in the 22/24-month old network is A130082M07Rik, a gene that  
327 functions as the T-cell receptor alpha chain variable 9D-3 region (S1 Table). This change in the  
328 top-ranked closeness centrality hubs suggests differences in T-cell clonal expansions in the two  
329 age-related groups, as has been previously described [24]. The functions of other high-ranking  
330 genes can be found in S1 Table.

331 **Table 6. Top 10 highest closeness centralities for core the young and old mouse networks.**

| 2 month Genes | Degree | Closeness  | 22-24 month   | Degree | Closeness  |
|---------------|--------|------------|---------------|--------|------------|
|               | Count  | Centrality | Genes         | Count  | Centrality |
| LOC386545     | 10     | 0.55       | A130082M07Rik | 15     | 0.38       |
| Leprotil1     | 9      | 0.51       | Trat1         | 11     | 0.38       |
| LOC436541     | 6      | 0.48       | Tcrb-V8.2     | 14     | 0.37       |
| LOC100048845  | 6      | 0.47       | Dgka          | 11     | 0.37       |
| Sema4f        | 6      | 0.46       | Lat           | 11     | 0.36       |
| Rnf125        | 8      | 0.46       | Tes           | 12     | 0.36       |
| LOC630408     | 7      | 0.45       | LOC100041103  | 10     | 0.35       |
| 2900016B01Rik | 4      | 0.45       | Cd3d          | 12     | 0.35       |



|           |   |      |       |    |      |
|-----------|---|------|-------|----|------|
| LOC386513 | 4 | 0.44 | Fyb   | 12 | 0.35 |
| Cd28      | 5 | 0.43 | Arl4c | 9  | 0.35 |

---

332

333 **Betweenness centrality.** *Betweenness centrality* represents the degree to which nodes stand in-  
 334 between each other. One can say that betweenness centrality represents the control a specified  
 335 node has over the network in that it finds nodes that act as bridges between nodes and – in a  
 336 sense – these nodes may control the flow in the network. Such genes are often called bottleneck  
 337 genes [58]. The higher the value of a node’s betweenness centrality, the greater the degree of  
 338 control the specified node exerts over the network.

339 Table 7 lists the top ten gene betweenness centrality values for both networks. Betweenness  
 340 centrality values for the 22/24-month network are significantly greater than those of the 2-month  
 341 network. In fact, they are 5-10 times those of the 2-month network. The gene Rnf12 is common  
 342 across both networks; although it does not have the same betweenness rank. Rnf125 is believed to  
 343 function as a positive regulator in the TCR signaling pathway. In the 2-month network, the highest  
 344 ranked gene is once more the TCR gene LOC386545, while diacylglycerol protein kinase  $\alpha$  (Dgka)  
 345 has the highest ranking in the older mouse network. Other high-ranking gene information can be  
 346 located in S1 Table.

347 **Table 7. Top 10 highest betweenness centralities for the 2 and the 22-24 month old**  
 348 **networks.**

| 2 month | Degree | Betweenness | 22-24 month | Degree | Betweenness |
|---------|--------|-------------|-------------|--------|-------------|
| Genes   | Count  | Centrality  | Genes       | Count  | Centrality  |

---

---

|               |    |        |               |    |         |
|---------------|----|--------|---------------|----|---------|
| LOC386545     | 10 | 209.43 | Dgka          | 11 | 1259.80 |
| Leprotl1      | 9  | 135.15 | Pik3r1        | 4  | 981.56  |
| Rnf125        | 8  | 97.96  | LOC385791     | 3  | 972     |
| LOC436541     | 6  | 69.78  | A130082M07Rik | 15 | 889.60  |
| Sema4f        | 6  | 67.67  | Trat1         | 11 | 836.06  |
| Arhgap9       | 4  | 66.15  | Rnf125        | 2  | 820     |
| LOC630408     | 7  | 56.64  | Tes           | 12 | 762.45  |
| Xlr4c         | 6  | 54.44  | Arl4c         | 9  | 697.60  |
| Cd28          | 5  | 53.85  | Dpysl2        | 3  | 670     |
| 2900016B01Rik | 4  | 51.29  | Fyb           | 12 | 558.61  |

---

349

350 **Network Stress and Eccentricity.** The maximum distance between a node and all other nodes is  
351 called the *eccentricity* of that node; biologically, this can be said to represent the easiness for all  
352 other genes in a network to reach another particular gene. Consequently, the higher the  
353 eccentricity value, the easier it is for a given gene to be influenced by the rest of the network –  
354 or, conversely, the easier it is for that node to influence the rest of the network [59]. The higher  
355 eccentricity in old mice may influence the time of processes and increase the delay in  
356 intracellular interaction pathways affecting efficiency of the cells. Table 8 lists the genes with the  
357 highest eccentricity values in both networks. We note that the eccentricity values in the 22/24-  
358 month network were higher when compared to the 2-month network. Whsc111 is the only gene  
359 with a highly ranked eccentricity value shared by both the young mouse and old mouse networks  
360 (Table 8). Whsc111 is defined as nuclear receptor binding SET domain protein 3 that methylates  
361 Histone 3 (S1 Table). The gene with the highest eccentricity in the 2-month network is Whsc111,  
362 and the highest ranked gene in the 22/24-month network is LOC674072 which is similar to Ig  
363 heavy chain V region 441 precursor.

364 **Table 8. Top 10 highest eccentricity values for the young and old mouse networks.**

| 2 month Genes | Degree | Eccentricity | 22-24 month | Degree | Eccentricity |
|---------------|--------|--------------|-------------|--------|--------------|
|               | Count  |              | Genes       | Count  |              |
| Whsc111       | 1      | 7            | LOC674072   | 1      | 12           |
| Txk           | 1      | 7            | LOC385081   | 1      | 12           |
| LOC100046087  | 2      | 6            | Tube1       | 1      | 12           |
| Trib2         | 1      | 6            | Hrb         | 1      | 11           |

|         |   |   |           |   |    |
|---------|---|---|-----------|---|----|
| Xlr4c   | 6 | 6 | Atp1b1    | 1 | 11 |
| Tes     | 2 | 6 | Cd8b1     | 2 | 11 |
| Lat     | 5 | 6 | LOC236170 | 3 | 11 |
| Il18r1  | 1 | 6 | Rgs10     | 1 | 10 |
| Fam105a | 3 | 6 | Cd3g      | 1 | 10 |
| Faah    | 1 | 6 | Ccdc88b   | 1 | 10 |
|         |   |   | Whsc111   | 1 | 10 |
|         |   |   | Ms4a6b    | 2 | 10 |
|         |   |   | Cd27      | 2 | 10 |
|         |   |   | Hsd11b1   | 3 | 10 |
|         |   |   | Dpysl2    | 3 | 10 |

---

365

366 *Stress* of a node in a biological network is defined as the number of shortest paths passing through  
367 a given node. It can be used to indicate the prominence of a gene in holding together connecting  
368 regulatory genes in a network pathway. The higher the value, the more importance the node has in  
369 holding together communicating nodes [59]. We find that stress in the top ten highest stress nodes  
370 in the 22/24-month old group appears much higher than the highest stress nodes in the 2-month  
371 old group (Table 9).

372 **Table 9. Top 10 highest stress values for the young and old mouse networks.**

| 2-month<br>Genes | Degree<br>Count | Stress | Stress/<br>Weiner<br>Index | 22-24-month<br>Genes | Degree<br>Count | Stress | Stress/<br>Weiner<br>Index |
|------------------|-----------------|--------|----------------------------|----------------------|-----------------|--------|----------------------------|
| LOC386545        | 10              | 554    | 0.25                       | Dgka                 | 11              | 6060   | 0.08                       |
| Leprotl1         | 9               | 316    | 0.14                       | Trat1                | 11              | 5906   | 0.08                       |
| Rnf125           | 8               | 252    | 0.11                       | Tes                  | 12              | 5496   | 0.07                       |
| Sema4f           | 6               | 214    | 0.10                       | A130082M07Rik        | 15              | 4750   | 0.06                       |
| Arhgap9          | 4               | 212    | 0.10                       | Arl4c                | 9               | 4066   | 0.05                       |
| LOC436541        | 6               | 208    | 0.09                       | Itk                  | 7               | 3936   | 0.05                       |
| LOC100048845     | 6               | 186    | 0.08                       | Pik3r1               | 4               | 3886   | 0.05                       |
| Cd28             | 5               | 158    | 0.07                       | LOC385791            | 3               | 3804   | 0.05                       |
| Xlr4c            | 6               | 158    | 0.07                       | Fyb                  | 12              | 3586   | 0.05                       |
| Fam105a          | 3               | 142    | 0.06                       | Rnf125               | 2               | 3180   | 0.04                       |

373

374 **Weiner index.** The *Weiner index* provides valuable context for these stress measures (Table 2).  
375 The Weiner index is the sum of the number of shortest paths in a network. We can use the  
376 Weiner index as a normalization factor. Comparing the ratio of the highest stress nodes to the  
377 Weiner index, we can see that the highest stress nodes in the older mouse group actually have a  
378 lower proportion of shortest paths in the total network as compared to the 2-month old group  
379 (Table 9). As a result, the genes with high stress values in the 2-month old group can be seen to  
380 have a greater impact on network connection than genes of high stress in the 22/24-month old  
381 group. Rnf125 is the only gene with high ranking in both networks and, as noted above, it is the  
382 only gene with high betweenness centralities shared by both networks as well. Rnf125 is similar  
383 to T-cell RNG activation protein 1. The function of genes with high-ranking stress values can be  
384 found in S1 Table.  
385

386 **Network Influence Measures.** There are three *influence measures* of importance, where  
 387 influence can be thought of as a measure of which nodes have power in a given network. These  
 388 influence measures are given by: (1) *Local influence*, (2) *Indirect influence* and (3) *Total*  
 389 *influence* [60]. The local influence of a node can be thought of as how much the given node  
 390 affects its one-hop neighbors; the nodes directly connected to a given node by an edge. The  
 391 indirect influence may be thought of as how much the given node affects its two-hop neighbors,  
 392 nodes whose paths are connected by a single node mediating node. Lastly, the total measure of  
 393 influence is defined as the weighted sum of the local and indirect influences. The ten highest  
 394 local, indirect, and total influence values for the young and old mouse networks can be found in  
 395 Tables 10-12. Again, a gene encoding TCR (LOC630408) is the only transcript in the top highest  
 396 local, indirect, and total influence values across both networks. The identity of genes in the  
 397 highest rank ordered influence values exclusive to each network can be found in S1 Table.

398 **Table 10. Top 10 highest local influence values for the young and old mouse networks.**

| 2 month<br>Genes | Local<br>Influence | 22-24 month<br>Genes | Local Influence |
|------------------|--------------------|----------------------|-----------------|
| LOC386545        | 0.99               | A130082M07Rik        | 1.16            |
| Leprotil1        | 0.94               | Lcp2                 | 1.15            |
| nf125            | 0.89               | LOC630408            | 1.15            |
| LOC630408        | 0.86               | Gtf2i                | 1.15            |
| LOC100048845     | 0.83               | C030002B11Rik        | 1.14            |
| Sema4f           | 0.82               | Spint2               | 1.14            |
| LOC436541        | 0.82               | Tcrb-V8.2            | 1.13            |
| Xlr4c            | 0.80               | Selplg               | 1.12            |
| LOC100043969     | 0.76               | Cd3d                 | 1.09            |

399 Lat 0.762 A130090K04Rik 1.09

400

401

402 **Table 11. Top 10 highest indirect influence values for the young and old mouse networks.**

| 2 month<br>Genes | Indirect<br>Influence | 22-24 month<br>Genes | Indirect<br>Influence |
|------------------|-----------------------|----------------------|-----------------------|
| Leprotl1         | 0.83                  | LOC630408            | 1.23                  |
| LOC386545        | 0.82                  | A130082M07Rik        | 1.23                  |
| LOC100048845     | 0.76                  | Spint2               | 1.20                  |
| LOC630408        | 0.75                  | Lcp2                 | 1.20                  |
| Rnf125           | 0.73                  | Selplg               | 1.18                  |
| LOC436541        | 0.73                  | A130090K04Rik        | 1.17                  |
| Xlr4c            | 0.72                  | Tcrb-V8.2            | 1.16                  |
| Sema4f           | 0.72                  | Cd3d                 | 1.16                  |
| LOC100043969     | 0.68                  | Gtf2i                | 1.14                  |
| Lat              | 0.673789              | C030002B11Rik        | 1.14                  |

418 **Table 12. Top 10 highest total influence values for the young and old mouse networks.**

| 2 month<br>Genes | Total<br>Influence | 22-24 month<br>Genes | Total<br>Influence |
|------------------|--------------------|----------------------|--------------------|
| LOC386545        | 0.92               | A130082M07Rik        | 1.19               |
| Leprotl1         | 0.89               | LOC630408            | 1.18               |
| Rnf125           | 0.82               | Lcp2                 | 1.17               |
| LOC630408        | 0.82               | Spint2               | 1.16               |
| LOC100048845     | 0.80               | Gtf2i                | 1.14               |
| LOC436541        | 0.78               | Selplg               | 1.14               |
| Sema4f           | 0.78               | Tcrb-V8.2            | 1.14               |



|     |              |      |               |      |
|-----|--------------|------|---------------|------|
| 419 | Xlr4c        | 0.77 | C030002B11Rik | 1.14 |
| 420 | LOC100043969 | 0.73 | A130090K04Rik | 1.13 |
| 421 | Lat          | 0.73 | Cd3d          | 1.12 |

422  
423

424 **Clustering Coefficient Analysis.** The *clustering coefficient* of a node is a measure of the degree  
425 to which genes in a network tend to cluster together around the particular gene [28]. The mean  
426 clustering coefficient for each network, defined as the sum total of all clustering coefficients  
427 divided by the number of nodes, is found in Table 13. The mean clustering coefficient for the 2-  
428 month network is 0.251, while the mean for the 22/24-month is 0.335. The genes with the  
429 highest clustering coefficients in the 2-month and 24-month core networks can be found in Table  
430 13. None of the genes with the highest clustering coefficients in the 2-month network were in the  
431 highest ranked genes for the 22/24-month network.

432 **Table 13. Top 10 highest clustering coefficients for core the young and old mouse networks.**

| 2 month      | Degree | Clustering  | 22-24 month   | Degree | Clustering  |
|--------------|--------|-------------|---------------|--------|-------------|
| Genes        | Count  | Coefficient | Genes         | Count  | Coefficient |
| Tes          | 2      | 1.0         | C920016N10Rik | 4      | 1.0         |
| LOC100046087 | 2      | 1.0         | Hsd11b1       | 3      | 1.0         |
| LOC100043969 | 5      | 0.7         | Faah          | 2      | 1.0         |
| Lat          | 5      | 0.7         | Npc2          | 7      | 0.90        |
| LOC386513    | 4      | 0.67        | Fam105a       | 7      | 0.86        |

|              |   |      |              |   |      |
|--------------|---|------|--------------|---|------|
| LOC100048845 | 6 | 0.6  | LOC100040243 | 4 | 0.83 |
| Sema4f       | 6 | 0.6  | Ldb1         | 4 | 0.83 |
| Cd28         | 5 | 0.6  | Xlr4c        | 5 | 0.8  |
| LOC630408    | 7 | 0.48 | Il7r         | 3 | 0.67 |
| LOC436541    | 6 | 0.47 | D12Ert551e   | 4 | 0.67 |
|              |   |      | Tcf7         | 4 | 0.67 |

---

433

434 Fig 7 illustrates the spread of clustering coefficients *vs.* degree (*k*). Blue points indicate  
435 older mice, while red points indicate the younger mice. Of immediate note is that the 22/24-month  
436 network has a wider range of clustering coefficients compared to the 2-month network.  
437 Meanwhile, the 2-month network clustering coefficients are more compactly distributed. This  
438 apparent increase in highly interconnected genes in the old mouse GCN is consistent with the  
439 observed large core network that makes up the old mouse GCN (Fig 3).

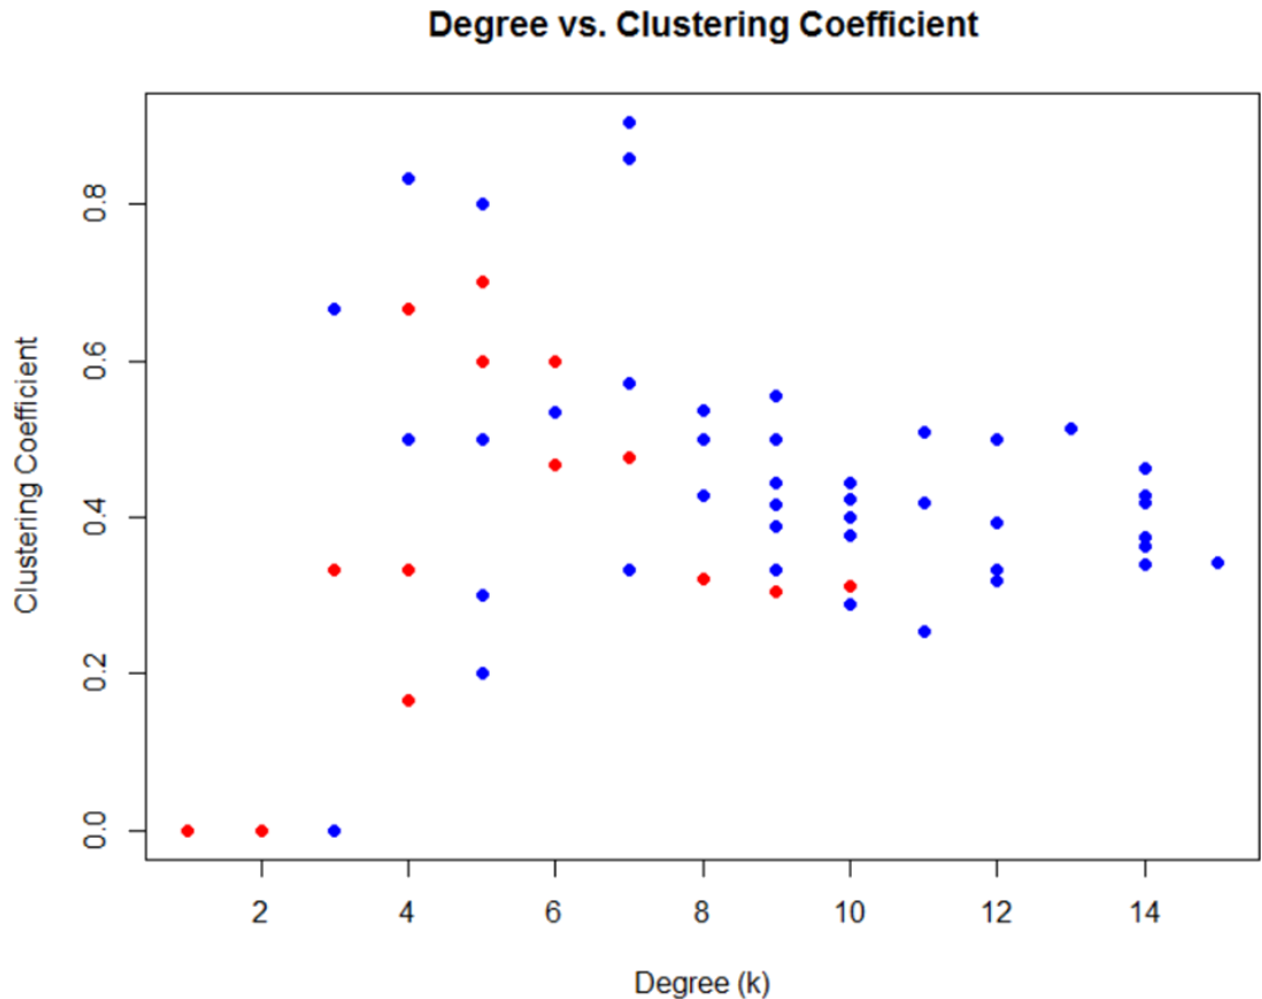

440

441 **Fig 7. Plot of clustering coefficient versus network degree for the network gene co-expression**  
442 **in the two, mouse age-groups.** Red points correspond with the 2-month age group, while blue  
443 corresponds with the 22/24-month age-group. It is straightforward to observe the large scattering  
444 of co-expression gene pairs in the 22/24-month age-group, while this is not the case for the 2-  
445 month old age group.

446

447 The program MCODE was used to find tightly connected subnetworks within a core  
448 network (<http://apps.cytoscape.org/apps/mcode>). MCODE is used to find clusters in network data

449 based upon core clustering coefficients. It can determine pathways of biological significance in  
 450 protein and gene networks. MCODE found four tightly linked subnetwork clusters in the 2-month  
 451 old network, and six tightly linked clusters in the 22/24-month old network (S3 Fig). The identity  
 452 of genes involved in these subnetworks can be found in S1 Table.

453

454 **Centrality Analysis of Conserved Gene Pairs.** Finally, we summarize the rankings of the  
 455 conserved co-expressed gene pairs (see Table 3) in Table 14. We note that Leprotl1 and the TCR  
 456 gene LOC386545 have most of the highest rankings among the genes that are conserved between  
 457 the young and the old networks.

458 **Table 14. Centrality rankings of genes with conserved co-expression in both networks.**

| Gene Names   | Degree |    | Eigenvector |   | Betweenness |   | Closeness |   | Clustering |   | Eccentricity |   | Stress |   | Local Influence |   | Indirect Influence |   | Total Influence |   |
|--------------|--------|----|-------------|---|-------------|---|-----------|---|------------|---|--------------|---|--------|---|-----------------|---|--------------------|---|-----------------|---|
|              | Y      | O  | Y           | O | Y           | O | Y         | O | Y          | O | Y            | O | Y      | O | Y               | O | Y                  | O | Y               | O |
| Sema4f       | 6      | -  | 7           | 6 | 5           | - | 5         | - | 7          | - | -            | - | 4      | - | 6               | - | 8                  | - | 8               | - |
| LOC630408    | 4      | 7  | 6           | - | 7           | - | 7         | - | 9          | - | -            | - | -      | - | 4               | 3 | 4                  | 1 | 4               | 1 |
| LOC386545    | 1      | -  | 1           | - | 1           | - | 1         | - | -          | - | -            | - | 1      | - | 1               | - | 2                  | - | 2               | - |
| Leprotl1     | 2      | -  | 2           | - | 2           | 1 | 2         | - | -          | - | -            | - | 2      | - | 2               | - | 1                  | - | 1               | - |
| Pik3r1       | -      | -  | -           | - | -           | - | -         | - | -          | - | -            | - | 7      | - | -               | - | -                  | - | -               | - |
| Dgka         | -      | -  | -           | - | -           | 1 | -         | 4 | -          | - | -            | - | 1      | - | -               | - | -                  | - | -               | - |
| Loc100043969 | 10     | -  | 10          | - | -           | - | -         | - | 3          | 1 | -            | - | -      | - | 9               | - | 9                  | - | 9               | - |
| CD28         | -      | -  | -           | - | 9           | - | 8         | - | 8          | - | -            | - | 8      | - | -               | - | -                  | - | -               | - |
| Terb-V8.2    | -      | 5  | -           | - | -           | - | -         | 3 | -          | - | -            | - | -      | - | 7               | - | 7                  | - | 7               | - |
| LOC100041103 | -      | -  | -           | - | -           | - | -         | - | -          | - | -            | - | -      | - | -               | - | -                  | - | -               | - |
| Tes          | -      | 10 | -           | - | -           | 7 | -         | 6 | 1          | - | 6            | - | 3      | - | -               | - | -                  | - | -               | - |
| Lat          | 9      | -  | -           | - | -           | 7 | -         | 5 | 4          | - | 7            | - | -      | - | 10              | - | 10                 | - | 10              | - |
| Xlr4c        | 8      | -  | 8           | - | 8           | - | -         | - | -          | 8 | 5            | - | 9      | - | 8               | - | 7                  | - | 7               | - |
| LOC100046087 | -      | -  | -           | - | -           | - | -         | - | 2          | - | 3            | - | -      | - | -               | - | -                  | - | -               | - |

459

460 Column headers indicate the age of the mice from which the samples were taken (Y: 2-month, O:  
 461 22/24 month). A dash indicates that the given gene was not in the top 10 genes for that centrality  
 462 variable. The braces correspond to the nodes (genes) at the end of the edges in Table 3. We note  
 463 that the edge with the gene pair LOC386545 (similar to T-cell receptor beta chain VNDNJC  
 464 precursor) – Leprotl1 (Leptin receptor overlapping transcript like 1) appears across all centrality  
 465 measures, except for clustering and eccentricity, in that it always ranks 1-2 for the young mouse

466 cells but not for the old mouse cells. This makes this edge and nodes pair a very powerful  
467 component in the young network.

468

### 469 Scale Free Analysis

470 Scale-free analysis has significance in biological networks [61-63]. Scale-free networks  
471 are networks whose degree distribution follows a power law with a power parameter that typically  
472 falls in the interval 2-3, however, it may fall outside this interval [64]. Analysis of our two network  
473 architectures showed that the two-month old GCN is of scale free type, while the scale-free  
474 network structure was weaker for the older mouse GCN. Power curve analysis, fitting the function  
475  $P(k) = Ak^\gamma$  to the  $P(k)$  for each network, showed that the younger mouse GCN followed a strong  
476 power law behavior ( $R^2 = 0.9192$ ,  $p$ -value  $< 0.001$ , Fig XA), while the older mouse group  
477 demonstrated a weaker power law behavior ( $R^2 = 0.4944$ ,  $p$ -value  $< 0.01$ , Fig XB).

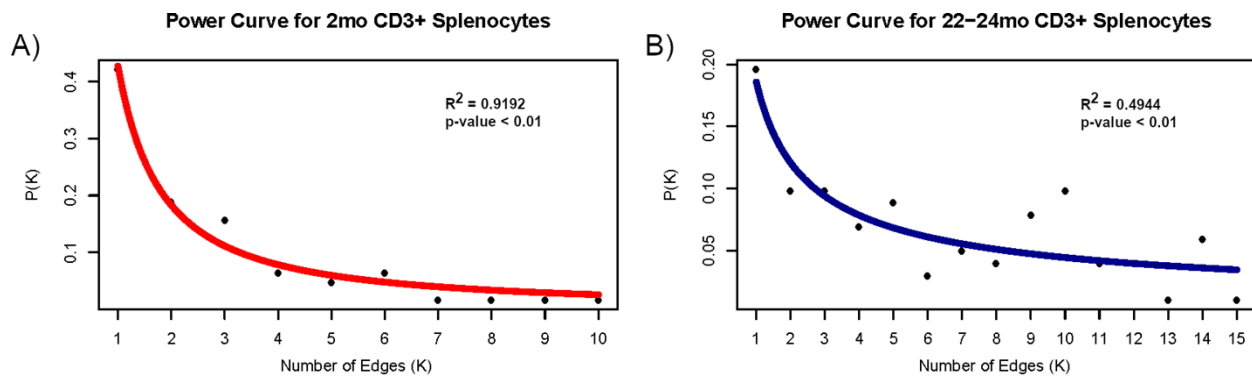

478

### 479 Fig 8. Power curve analysis of the two age-related networks based on degree distribution.

480 Fitting the curve  $P(k) = Ak^{-\gamma}$ : Probability of degree frequency `` $k$ '' in (A) the two-month-old  
481 mice group can be moderately predicted by power law analysis ( $R^2 = 0.9192$ ,  $p$ -value =  $1.2 \times 10^{-5}$ ,

482  $\log P(k) = -1.58\log(k) - 0.25$ ). The predictive strength of this model was weakened in (B) the  
483 22/24-month old group ( $R^2= 0.4944$ ,  $p\text{-value}=0.003452$ ,  $\log P(k) = -0.7461\log(k) - 0.6883$ ).

484

## 485 **Discussion**

486 The gene co-expression network analysis of a 130 gene signature from young and old mice  
487 yielded a variety of interesting insights and conclusions about aging. First, we observe an alteration  
488 of the TCR signaling pathway in old mice, where the TCR complex and CD28 co-stimulatory  
489 molecules upstream the pathways are particularly affected. The RNA encoding the proteins present  
490 on the membrane of T-cells required for full T cell activation were co-expressed in the young  
491 mouse GCN, while this was not true of the old mouse network. The small core network of TCR-  
492 related genes in the young mice reveals that gene co-expression for proteins involved in TCR  
493 signaling are stable across the three strains of mice, suggesting the core network is robust across  
494 the genetic variation in mice strains.

495 Further, while the network of young mice is well organized and reflects controlled  
496 development across each genetic background, those of old mice appears more stochastic. We found  
497 a 255% increase in the number of edges in the 22/24-month old network when compared to the 2-  
498 month old network. However, we only found seven edges in the 22/24-month network that were  
499 also found in the 2-month network. This suggests that many of the edges in the 22/24-month old  
500 GCN were the result of novel co-expression relationships likely gained as a result of age.

501 Power law analysis suggests a deterioration in network organization in the old mouse  
502 network compared to the young mice. Analysis by power law demonstrated the 2-month old  
503 network was a scale-free network type, while the 22/24-month old network was not. Scale-free

504 networks are frequently more robust to perturbations than are other network architectures,  
505 indicative of both complexity and organization. The scale-free network structure of the 2-month  
506 GCN is typical of most biological networks [62]. Scale-free network types may provide an  
507 advantage to biological systems that are subject to damage by mutation and/or viral infection. The  
508 scale-free network structure of the young CD3<sup>+</sup> T-cells indicates that transcription of genes is  
509 tightly regulated in the splenocytes of 2-month old mice that are fully immunocompetent. Decrease  
510 in scale-free structure in the co-expression patterns of the 22/24-month old mouse splenocytes  
511 suggests that this control is decreased with age.

512         This change in network architecture has interesting implications for the regulatory behavior  
513 of genes in older T-cells. Because the major signal transduction from the TCR complex and CD28  
514 is disturbed, the expression of the internal cell molecules is consequently perturbed in senescent  
515 T-cells. That the 22/24-month old mouse splenocytes see an increase in correlation at the expense  
516 of more organized network structures suggests T-cell regulation and immune behavior is  
517 diminished. Indeed, in the same series of FVB and B6 mice, we previously quantified by flow  
518 cytometry and mathematical models that the T-cell cycle transition rates and proliferation/death  
519 rates were altered in 18 month-old mice as compared to 2 month-old mice [24]. And while we  
520 have no direct evidence for the implication of these results with respect to human immune T-cell  
521 dynamics, we do know that human T-cell populations are also altered with age, and that there are  
522 a variety of other changes in T-cell behaviors in humans: in particular, changes in signal  
523 transduction in T-cells, and the promotion of long lived T-cells with less efficient function and  
524 inflamm-aging [65], even while the total lymphocyte maintenance is preserved [66].

525         Changes in network structure with age also reveal differential co-expression relationships  
526 in several key gene pathways. For example, expression of Transcription Factor 7 (TCF7) is

527 important for T-lymphocyte differentiation. This transcription factor is essential for the  
528 proliferation of early DN thymocytes, the survival of DP cells, positive/negative selection, as well  
529 as for the creation of the CD3/TCR complex and the cell cycle control, and, in peripheral tissues,  
530 for the orientation to the TH2 pro-inflammatory pathways and activation of memory CD8 T-cells  
531 [67]. We previously quantified increased time spent in gap phases of the cell cycle leading to  
532 decreased division rates in immature DN and mature CD3hi DP thymocytes in FVB mice: the time  
533 spent in gap phases in G0/G1 and G2/M2 from DN to CD3hi DP increases from 10.2 days in young  
534 B6 mice to 28 days in young FVB mice, and even up to 58 days in 18 months old FVB mice. These  
535 proliferation rates were decreased in thymus and the spleen in FVB mice, as compared to B6 mice,  
536 contributing to acceleration of the thymic involution [24]. We also found increased occurrence of  
537 oligoclonal expansions of CD8 T-cells in FVB old mice [25].

538         Additionally, we previously observed an increase in differentiation of Tregs in old FVB  
539 mice but defective proliferation in the spleen. Interestingly, such a defect could be related to a  
540 deficiency of TCF7 in old FVB mice. Such a defect would lower the threshold to differentiate  
541 Tregs.

542         In the 2-month old network, TCF7 falls in a three-node island with genes Lck and CD28e.  
543 Transcription of TCF7 is previously reported to correlate with the expression of both Lck and  
544 CD28e [68-69], and the 2-month old network indicates these biological relationships. This co-  
545 expression linkage is lost in the 22/24-month old GCN, where the TCF7 node loses connections  
546 to Lck and CD28e and gains co-expression relationships with genes Xlr4a, Xlr4c, C430010C01  
547 and TCR probe LOC10004608. This suggests massive alteration in this gene regulatory pathway  
548 with age. Because TCF7 increases Th2 differentiation and inflammation, these changes in co-



549 expression relationships might contribute to inflammation [67], in addition to changes in T-cell  
550 populations observed with age [24] [25].

551           However, it is not fully known if the increase in co-expression relationships across the old  
552 mouse GCN serves any biological function, or whether these changes have a detrimental or  
553 compensatory impact on gene expression behavior in old T-cells. Some results in the original  
554 signature, however, suggested biological relevance with what is currently known about T-cells  
555 during immunosenescence. The old mice had lower expression of these genes related to TCR  
556 activation, such as CD3, VB8.2, co-stimulation molecule CD28, early activation molecule CD69,  
557 adhesion molecule VCAM1, Thy1, receptor to lymphokines IL-7R, and CD27. The TCR/CD3  
558 complex receptor-to-antigen interaction, and the downstream signal transduction involving  
559 LCP2/SLP-76 recruitment, binding GADs and lat, the co-stimulatory signal via CD28 and its  
560 cytoplasmic tail binding, and CTLA-4 are all affected by age [49-50]. We observed that the aging  
561 signature affects several functions related to hematopoietical system as seen in IPA (S2 Fig),  
562 related not only to activation (TCR/CD3/CD69), but also binding and adhesion/interaction  
563 (VCAM1). Pathway enrichments for the genes appearing in both networks also suggest these genes  
564 play a role in changes in the immune system with age (Fig 2).

565           Differences in network hubs within the two age-related networks can be used to infer more  
566 about changes in key gene pathways that may be attributable to age. Hubs are important  
567 determinants of system functions in a biological network; in co-expression networks, deletion of  
568 a hub gene is likely to result in cell death [70]. Across the two age-related GCNs, very few of the  
569 hub genes as defined by degree, eigenvector, betweenness, and closeness centralities, as well as  
570 the influence measures, clustering coefficient, eccentricity, and stress values, were the same  
571 (Tables 4-13). Further, very few hub genes in the older mouse network were highly rated across

572 the different node centrality measures, while there was more consistency and less variety of highly-  
573 rated genes in the young mouse network. This suggests the hubs in the young mouse network have  
574 overall more control, importance, and power over the network structure compared to the old mouse  
575 network hubs.

576 Two genes with a co-expression relationship conserved across both networks, *Sema4f*  
577 (*sema* domain, immunoglobulin domain (Ig), TM domain, and short cytoplasmic domain) and  
578 TCR (gene LOC630408, T-cell receptor alpha chain V region CTL-L17 precursor), appeared in a  
579 high rank across multiple hub measures for both age-related networks, as summarized in Table 14.  
580 Additionally, both *Sema4f* and TCR/LOC630408 were incorporated into a tightly clustered  
581 MCODE subnetwork for the young mouse group (S3A Fig), but not the old mouse network (S3B  
582 Fig). That the co-expression relationship between these genes is conserved in both networks  
583 implies this expression relationship has important biological function, or a precursor to these genes  
584 serves as an important biological mediator. Further, that these genes serve as important hubs in  
585 both networks suggests a biological importance of both genes in both young and old splenocytes,  
586 although the lower centrality rankings and lack of MCODE clustering for the older mice suggests  
587 these genes have a diminishing role with age.

588 We note that the edge of co-expression with the gene pair TCR (LOC386545 similar to T-  
589 cell receptor beta chain VNDNJC precursor) – *Leptol1* (*Leptin* receptor overlapping transcript  
590 like 1) appears across all centrality measures, except for clustering and eccentricity, in that it  
591 always ranks 1-2 for the young mouse cells but not for the old mouse cells (Table 14). This makes  
592 this edge and nodes pair a very powerful component in the young network. The *Leptol1* gene  
593 encodes a homologue of the leptin membrane receptor. Leptin is an adipokine that regulates  
594 appetite and food intake but also is involved in T-cell differentiation and regulation of adiposis

595 and the immune system. Notably, the exponential rise in metabolic and autoimmune diseases with  
596 age might be related to metabolism and leptin. Leptin is secreted by both adipocytes and T-cells,  
597 in particular this autocrine production by Treg cells can down-regulate T-cell proliferation during  
598 immune response and prevent inflammation [71]. Interestingly, leptin inhibits the proliferation of  
599 Treg cells [72] and their control of inflamm-aging. The leptin receptor is further involved in  
600 JACK2 STAT-3 orientation and Thelper cell activation, promoting Th17 differentiation but  
601 inhibiting Treg differentiation. Moreover, leptin promotes the proliferation of naïve T-cells but  
602 inhibits the proliferation of memory T-cells. The *Leptol1* gene is highly expressed in FVB mice,  
603 as is CD69, an early activation marker of T-cells. Notably, by contrast, these proteins are lesser  
604 expressed in B6 and BALB/c mice. The conservation of co-expression of *Leptol1* and the TCR  
605 gene across the age-related networks stresses the biological importance of this co-expression  
606 relationship, but changes in network hub rankings suggests the downstream pathways of the leptin  
607 receptor are altered with age.

608 In conclusion, we found significant deterioration of network organization when comparing  
609 the 2-month network to the 22/24-month network and observed changes in hub genes suggesting  
610 changes in TCR signaling and co-stimulation through CD28 in the two age-related groups. This  
611 analysis provides evidence of a defective organization of transcription in older peripheral T-cells.  
612 This dis-organization is suspected to increase delays in T-cell regulation pathways and inhibit the  
613 biological activity of CD3+ lymphocytes, while other cells die and cannot be quantified here. In  
614 addition, the identification of hub genes for network expression in the young and old mouse groups  
615 help identify genes important to healthy cell function and deteriorating function with age,  
616 providing opportunities to approach these genes as potential therapeutic targets to help aging

617 patients. Human orthologs of the genes used in this analysis (S1 Table) could help to understand  
618 human aging in lymphocytes.

### 619 **Limitations**

620 Previous GCN research using AGEMAP data found a decrease in gene co-expression with  
621 age in mice across multiple tissue types [38]. This contrasts with the results of this study, which  
622 found a nearly 255% increase in the number of edges in the old mouse group GCN as compared  
623 to the younger mouse group. There are several factors that may contribute to this result. One  
624 component may be experiment design: the AGEMAP study utilized tissue from only C57BL/6  
625 mice, both male and female, instead of using exclusively female mice from three separate mouse  
626 lines. Additionally, samples in the AGEMAP study were extracted from mice at ages 16 and 24  
627 months, as opposed to 2 and 22-24 months. The size of both datasets may also contribute in  
628 different, limited results (10 mice per age/sex, as opposed to 11-12 mice per age group). Finally,  
629 an important factor is that the AGEMAP study did not look at co-expression in peripheral T-cells,  
630 which may behave differently from other cell types across the aging process. Indeed, T-cells are  
631 permanently selected to survive and to divide through the TCR complex and co-stimulation  
632 pathways, or they undergo apoptosis if too many default signals occur (as during the cell cycle).  
633 Results by Vibert & Thomas-Vaslin [24] show that across ages and genetic backgrounds, immature  
634 T-cells in the thymus and mature T-cells in spleen show a decrease in T-cell proliferation with  
635 early T-cell differentiation, compensated by an increase of proliferation of effector/memory T-  
636 cells in spleen, that often correlates with oligoclonal T-cell expansions [25]. Because 92% of the  
637 edges in the younger mouse GCN are lost in the older mouse GCN, differences in network  
638 architecture may be attributed to age-related changes in key biological pathways in CD3+  
639 splenocytes.

640 Another limitation of this study is that the dataset contains expression data from an array  
641 of T-cell subtypes not separated based on differentiation markers. Therefore, changes in co-  
642 expression behavior attributable to naïve, CD4+, or CD8+ cells cannot be discerned through this  
643 analysis.

644 In humans CD4, CD8, and CD3 T-cells present some overlap in gene expression during an  
645 immune response [73]. While thymic output of T-cells decreases with age, it is known that in some  
646 cases, older mice still produce naïve T-cells [25, 74]. This suggests the spleen dataset for the older  
647 mouse network may include expression data from both new and senescent T-cells, cell types which  
648 might demonstrate differential gene co-expression and proliferation propensity [30]. However,  
649 the production of naïve T-cells in mice is diminished around 5-10 fold in 18 old months mice, as  
650 it is also the case in human at midlife, at about 50 years [25]. In humans, there is 95% gene  
651 similarity between naïve and memory T-cells [75]. In C57BL/6 mice, both isolated naïve and  
652 memory CD4 T-cells from old mice present different alteration in gene expression, but both  
653 expression profiles are turned to inflammation [76]. Additionally, naïve and memory CD4 T-cells  
654 share fewer genes in common in old than in young mice, suggesting also a deterioration of these  
655 transcriptional pathways with aging. Over time, naïve T-cells may also increase their ability to  
656 persist [77]. Certain transcriptional changes, such as an increase in metabolism during the  
657 transition from naïve to effector T-cells, could not be accessed here [78].

658 The other limitation is the evolution of Treg cells, which represent only 1% of lymphocytes  
659 (about 5-10% of CD4), but their numbers increase with aging while their functionalities and  
660 regulatory functions decrease with the secretion of IL-2. In young mice, IL-2 at low doses  
661 stimulates Treg and negatively regulate T-cell proliferation, while at high doses IL-2 upregulates

662 the proliferation of T-cells [25]. The role of Tregs in adipose-associated tissues is also correlated  
663 with increasing expression of anti-inflammatory genes such as IL-10.

664 Of course, these different age-related alterations in cell behavior are not specific to T-cell  
665 subtypes. Studies have found biomarkers of aging and senescence in other tissues in mice that  
666 suggest there may be cell-specific changes in gene expression with age [79]. Due to these  
667 variations, further investigations into co-expression in T-cells based on cellular age and T-cell  
668 subtype are necessary.

669 Interestingly, results by Vibert & Thomas-Vaslin show T-cell proliferation/death rates has  
670 higher inter-individual variation in the older mouse group when compared to the younger mouse  
671 group [24]. This may have an impact on the increased co-expression relationships evident in the  
672 old mouse GCN. Genes that are co-expressed in the old mouse group may also vary, resulting in  
673 the increased representation of nodes and edges in the old mouse GCN. This suggests co-  
674 expression pathways affected by age in CD3<sup>+</sup> splenocytes vary based on genetic background and  
675 individual influences, demonstrating the need for future investigation into co-expression  
676 relationships in T-cells with age.

## 677 **Methods**

### 678 **Mice**

679 C57BL/6J (B6), BALB/cByJ and FVB/N (FVB) mice were obtained from Charles River  
680 Laboratories at 4 weeks of age, maintained in SPF conditions in our animal house (Centre  
681 d'Exploration Fonctionnelle Pitié Salpêtrière–Paris) and fed with the same diet. Mice were  
682 sacrificed at 2 and 22-24 months of age. Mice were manipulated according to European council  
683 directive 86/609/EEC of 24 November 1986 and with the approval of an ethics committee.

## 684 **Sorting of CD3+ cells for mRNA preservation**

685 Mice were sacrificed by cervical dislocation and spleens were collected. Cell suspensions  
686 were obtained by mechanical disruption of organs in PBS + 3% newborn calf serum at 4°C, were  
687 then washed, and viable cells were counted by trypan blue exclusion. CD3+ cells were isolated by  
688 positive selection using anti-CD3 biotiny followed by streptavidin beads labelling and passage  
689 through LS magnetic Miltenyi column to recover fixed cells.

## 690 **Transcriptomics profiling**

691 Gene expression was measured in CD3+ splenocytes extracted from FVB/N (n=4 young  
692 and n=3 old), C57BL/6N (n=4 young and n=3 old), and BALB/cByJ (n=4 young and n=5 old)  
693 mice. The young mice were age two months old. The old mice were age 22-24 months old.

694 One million purified cells were lysed in Trizol (Invitrogen) and immediately transferred to  
695 -80°C for storage. Samples were then lysed and total RNA was purified using Trizol (Invitrogen)  
696 according to the manufacturer's instructions. RNA yield was assessed using a NanoDrop 1000  
697 spectrophotometer (NanoDrop Products, Thermo Fisher Scientific). RNA integrity was assessed  
698 using an Agilent Bioanalyzer showing a quality RNA integrity number of 8–10 (Agilent  
699 Technologies). The RNA was processed using the Illumina TotalPrep RNA Amplification Kit  
700 Protocol according to the manufacturer's protocol. Briefly, labeled complementary RNAs (cRNAs)  
701 were hybridized overnight with Illumina MouseWG-6 v2.0 Expression BeadChip arrays. The  
702 arrays were then washed, blocked, stained and scanned on an Illumina BeadStation following the  
703 manufacturer's protocols. Illumina BeadStudio software (Illumina) was used to generate signal  
704 intensity values from the scans as previously described [85].

## 705 **Filtration and normalization of transcriptomics data**

706           Microarray probes were filtered out from the analysis if their expression was below the  
707 detection limit (p-value < 0.05) in at least 2 out of 3 samples in both the microenvironment and  
708 control groups. Next, data were log-transformed and normalized by the quantiles method using the  
709 R package limma v3.28.4.

## 710 **Identification of specific molecular signatures**

711           Specific molecular signatures were generated and statistically tested using the ICA/GSEA  
712 method [86], a strategy that combines the Independent Component Analysis (ICA) and the Gene  
713 Set Enrichment Analysis (GSEA). ICA, an unsupervised method, separates gene expression into  
714 non-Gaussian and statistically independent components. From each component, two potential  
715 molecular signatures were defined as those genes having extreme loading on components.  
716 Signatures were assembled in a database and tested for their enrichment in GSEA using the “pre-  
717 ranked list” option. Gene lists were sorted according to the value of the limma’s eBayes statistic.  
718 We used the weighted scoring scheme to compute the enrichment score. GSEA provides a  
719 normalized enrichment score, permutation p-value and FDR q-value indicating the significant  
720 level of each signature. A detailed explanation of GSEA can be found in Subramanian et al. [87].  
721 Based upon altered gene expression in all aging mice, a total of 130 immune-related genes from  
722 the signature with the highest p-value (a signature named C2-5) was chosen for analysis among  
723 900 signatures [24]. This signature was chosen since it allows to distinguish young from old mice,  
724 independently of their genetic origin. The resulting gene expression data was then grouped by age  
725 (12 young mice and 11 old mice) and gene co-expression.



## 726 **Gene co-expression networks construction**

727 The Spearman rank correlations ( $r_s$ ) measuring co-expression levels were standardized by  
728 squaring  $r_s$ , and the coefficient of determination  $R^2$  was used for network construction. This  
729 transformation ensures that the co-expression dataset included both strong positive and strong  
730 negative expression correlations. Significant co-expressed genes incorporated into network  
731 construction were defined as correlated gene pairs which had an  $R^2 > 0.8$  and a p-value  $< 0.01$   
732 [84]. The Python scripts used to filter this dataset based on these parameters are available on  
733 GitHub (<http://github.com/mairml/network-analysis>).

## 734 **Gene functional enrichment analysis**

735 Human orthologues for the *mus musculus* genes, in the two networks, were determined  
736 using OrthoDB (<http://orthodb.org>). Additional functional annotations were retrieved from  
737 GenBank. All orthologues and functional annotations are provided in **S1 Table**.

738 MSigDB from GSEA was used to determine genes in each network that share common  
739 biological pathways in KEGG and REACTOME databases  
740 (<http://software.broadinstitute.org/gsea/msigdb/annotate.jsp>). Gene overlaps were calculated  
741 using an FDR of less than 0.05 in the Novartis human tissue compendium. Ingenuity Pathway  
742 Analysis was additionally utilized to analyze pathway enrichments in the dataset.

## 743 **Network topological analysis**

744 Both the young and old mice networks were visualized using Cytoscape version 3.6.0  
745 (<http://cytoscape.org/download.php>). The following network properties were calculated: network  
746 diameter, eigenvalue and betweenness centrality, clustering and closeness, network stress, network  
747 radius, network eccentricity, clustering, local influence, indirect and total influence. Built-in

748 Cytoscape network analysis tools were used to find the mean shortest path, mean edge count,  
749 network diameter, radius and clustering coefficients for both GCNs. CentiScaPe version 2.2 was  
750 used to calculate centrality measures for each of the two networks  
751 (<http://apps.cytoscape.org/apps/centiscape>). The Grafman software was used to cross-check  
752 analysis results. The Grafman software is available from Bonchev [85]. Cytoscape plugin MCODE  
753 (<http://apps.cytoscape.org/apps/mcode>) was used to identify network clusters. Node influence was  
754 calculated using the algorithms discussed by Qiao *et al.* [60]. Adjacency matrices were calculated  
755 in Python (available at GitHub) and visualized in using the R package pheatmaps ([http://cran.r-](http://cran.r-project.org/package=pheatmap)  
756 [project.org/package=pheatmap](http://cran.r-project.org/package=pheatmap)). Distance matrices were calculated in Python (available at  
757 GitHub). Frequency distribution for each network was calculated using a Python script (available  
758 at GitHub). The frequency distributions were then scaled to probabilities and subsequently plotted  
759 in R v 3.1.1. Log-log plots associated with each of the model forms were used to estimate the  
760 model parameters. All parameters were estimated using linear regression on the log-transformed  
761 data [35-36].

## 762 **Acknowledgments**

763 We would like to thank Dr. Phuong Pham (Sorbonne Université- INSERM UMRS 959  
764 Immunology, Immunopathology, Immunotherapy CERVI, Pitié-Salpêtrière Hospital, Paris,  
765 France) for providing the C2-5 signature, for the conversion of microarray data into correlation  
766 matrices and for the constant support, and advice throughout the execution of this project. We  
767 would also like to thank Dr. Danail Bonchev (Virginia Commonwealth University) for his  
768 generous assistance in providing us with Grafman software as well as for his time in discussing  
769 network mathematics with us. Moreover, we wish to thank him for his assistance with some of the  
770 network calculations. Lastly, we would like to thank Dr. Wei Shan (Beihang University, China)

771 and his team for his sharing their software for the calculation of local and global node power in a  
772 network.

773

## 774 **References**

- 775 1. Lavelle C, Berry H, Beslon G, et al. From molecules to organisms: towards multiscale  
776 integrated models of biological systems. *Theoretical Biology Insights*. 2008;1:13–22.
- 777 2. Federal Interagency Forum on Aging Related Statistics. Older Americans Key Indicators  
778 of Well-Being. Information Dissemination Staff, National Center for Health Statistics,  
779 3311 Toledo Road, Room 5412, Hyattsville, MD 20782. 2016. Available from:  
780 [https://agingstats.gov/docs/LatestReport/Older-Americans-2016-Key-Indicators-of-](https://agingstats.gov/docs/LatestReport/Older-Americans-2016-Key-Indicators-of-WellBeing.pdf)  
781 [WellBeing.pdf](https://agingstats.gov/docs/LatestReport/Older-Americans-2016-Key-Indicators-of-WellBeing.pdf)
- 782 3. He W, Goodkind D, Kowal P. An Aging World. U.S. Census Bureau, International  
783 Population Reports, P95/16-1, U.S. Government Publishing Office, Washington, D.C.  
784 2016. Available from:  
785 [https://www.census.gov/content/dam/Census/library/publications/2016/demo/p95-16-](https://www.census.gov/content/dam/Census/library/publications/2016/demo/p95-16-1.pdf)  
786 [1.pdf](https://www.census.gov/content/dam/Census/library/publications/2016/demo/p95-16-1.pdf)
- 787 4. Ezrati M. Aging demographics: A threat to the economy and finance. 2018. Available  
788 from: [https://www.forbes.com/sites/miltonezrati/2018/04/23/aging-demographics-a-](https://www.forbes.com/sites/miltonezrati/2018/04/23/aging-demographics-a-threat-to-the-economy-and-to-finance/#155cfa1e3f2e)  
789 [threat-to-the-economy-and-to-finance/#155cfa1e3f2e](https://www.forbes.com/sites/miltonezrati/2018/04/23/aging-demographics-a-threat-to-the-economy-and-to-finance/#155cfa1e3f2e).
- 790 5. Acemoglu D. & Johnson S. Disease and development: The effect of life expectancy on  
791 economic growth. National Bureau of Economic Research, Working Paper 12269 or  
792 *Journal of Political Economy*. 2006; vol. 115 (6): 925 – 985. doi: 10.3386/w12269

- 793 6. Panda A, Arjona A, Sapey E, Bai F, Fikrig E, Montgomery RR, et al. Human innate  
794 immunosenescence: causes and consequences for immunity in old age. *Trends in*  
795 *Immunology*. 2009; 30 (7): 325 – 332. doi: 10.1016/j.it.2009.05
- 796 7. Nikolich-Žugich J. The twilight of immunity: emerging concepts in aging of the immune  
797 system. *Nature Immunology*. 2018; 19: 10 – 19. doi: 10.1038/s41590-017-0006-x
- 798 8. Graham P. Immunosenescence comes of age, symposium on aging, research &  
799 immunity: the impact of genomics. *EMBO Report*. 2007; 8 (3): 220 – 223. doi:  
800 10.1038/sj.embor.7400922
- 801 9. Weiskopf D, Weinberger B, Grubeck-Loebenstien B. Review: The aging of the immune  
802 system. *Transplant International*. 2009; 22: 1042-1050. doi: 10.1111/j.1432-  
803 2277.2009.00927.x
- 804 10. Aw D, Silva AB, Palmer DB. Immunosenescence: emerging challenges for an ageing  
805 population. *Immunology*. 2006; 120: 435 – 446. doi: 10.1111/j.1365-2567.2007.02555.x
- 806 11. Castle SC. Clinical relevance of age-related immune dysfunction. *Clinical Infectious*  
807 *Diseases*. 2000; 31: 578 - 585. doi: 1058-4838/2000/3102-0031.
- 808 12. Caruso C, Buffa S, Candore G, Colonna-Romano G, Dunn-Walters D, Kipling D, et al.  
809 Mechanisms of immunosenescence. *Immunity & Aging*. 2009; 6: 10. doi: 10.1186/1742-  
810 4933-6-10
- 811 13. Accardi G, Caruso C. Immune-inflammatory responses in the elderly: an update.  
812 *Immunity & Aging*. 2018; 5: 11. doi: 10.1186/s12979-018-0117-8
- 813 14. Accardi G, Caruso C. Immune-inflammatory responses in the elderly: an update.  
814 *Immunity & Aging*. 2018; 5: 11. doi: 10.1186/s12979-018-0117-8

- 815 15. Vallejo A. Immunological hurdles of ageing: Indispensable research of the human model.  
816 Ageing Res. Rev. 2011; 10 (3): 315 – 318 doi: 10.1016/j.arr.2011.01.005
- 817 16. Martorana A, Bulati M, Buffa S, Pellicano M, Caruso C, Candore G, et al.  
818 Immunosenescence, inflammation and Alzheimer’s disease. Longev Healthspan. 2012;  
819 1:8. doi: 10.1186/2046-2395-1-8
- 820 17. Weng N. Aging of the immune system: How much can the adaptive immune system  
821 adapt? Immunity. 2016; 24 (5): 495 – 499. doi: 10.1016/j.immuni.2006.05.001
- 822 18. McElhaney JE, Effros E. Immunosenescence: What does it mean to health outcomes in  
823 older adults? Current Opinion in Immunology. 2009; 21 (4): 418 – 424. doi:  
824 10.1016/j.coi.2009.05.023
- 825 19. Onder G, Rezza G, Brusaferro S. Case-Fatality Rate and Characteristics of Patients  
826 Dying in Relation to COVID-19 in Italy. JAMA. 2020 May 12;323(18):1775-1776. doi:  
827 10.1001/jama.2020.4683. Erratum in: JAMA. 2020 Apr 28;323(16):1619. PMID:  
828 32203977.
- 829 20. Montecino-Rodrigues E, Berent-Maoz B, Dorshkind K. Causes, consequences and  
830 reversal of immune system aging. J. Clin. Invest. 2013; 123(3): 958–965.  
831 doi:10.1172/JCI64096.
- 832 21. Hayes L, Maue AC. Effects of aging on T-cell function. Current Opinion in Immunology.  
833 2009; 21:414 -417. doi: 10.1016/j.coi.2009.05.009.
- 834 22. Pawelec G, Barnett Y, Forsey R, Frasca D, Globerson A, McLeod J, et al. T-cells and  
835 aging, January 2002 update. Front Biosci. 2002; 7:d1056-183. doi: 10.2741/A831

- 836 23. Jackola DR, Hallgren HM. Dynamic phenotypic restructuring of the CD4 and CD8 T-cell  
837 subsets with age in healthy humans: a compartmental model analysis. *Mech. Aging &*  
838 *Dev.* 1998; 105: 241–264. doi: 10.1016/S0047-6374(98)00089-X
- 839 24. Vibert J, Thomas-Vaslin V. Modelling T-cell proliferation: Dynamics heterogeneity  
840 depending on cell differentiation, age, and genetic background. *PLoS Comput Biol.* 2017;  
841 13(3):e1005417. doi: 10.1371/journal.pcbi.1005417
- 842 25. Thomas-Vaslin V, Six A, Pham HP, Dansokho C, Chacara W, Gouritin B, Bellier B,  
843 Klatzmann D. Immunodepression and Immunosuppression During Aging,  
844 Immunosuppression - Role in Health and Diseases. *IntechOpen.* 2012. DOI:  
845 10.5772/29549.
- 846 26. Thomas-Vaslin V, Korthals Altes H, de Boer RJ, Klatzmann D. Comprehensive  
847 Assessment and Mathematical Modeling of T Cell Population Dynamics and  
848 Homeostasis. *The Journal of Immunology.* 2008; 180 (4) 2240-2250. DOI:  
849 10.4049/jimmunol.180.4.2240
- 850 27. Vaz NM, Carvalho CR. On the origin of immunopathology. *J Theor Biol.* 2015 Jun  
851 21;375:61-70. doi: 10.1016/j.jtbi.2014.06.006. Epub 2014 Jun 14. PMID: 24937801.
- 852 28. Southworth LK, Owen AB, Kim SK. Aging mice show a decreasing correlation of gene  
853 expression within genetic modules. *PLoS Genet.* 2009; 5(12):e1000776. doi:  
854 10.1371/journal.pgen.1000776
- 855 29. Viiá-Vialaneix N, Liaubet L, Laurent T, Cherel P, Gamot A, SanCristobal M. The  
856 structure of gene co-expression network reveals biological functions underlying eQTLs.  
857 *PLOS One.* 2013; 8 (4): e60045. doi: 10.1371/journal.pone.0060045

- 858 30. Wisecaver JH, Borowsky AT, Tzin V, Jander G, Kliebenstein DJ, Rokas A. A Global  
859 Coexpression Network Approach for Connecting Genes to Specialized Metabolic  
860 Pathways in Plants. *Plant-cell*. 2017;29(5):944-959. doi: 10.1105/tpc.17.00009
- 861 31. Monaco G, Van dam S, Casal Novo Ribeiro JL, Larbi A, De Magalhães JP. A  
862 comparison of human and mouse gene co-expression networks reveals conservation and  
863 divergence at the tissue, pathway and disease levels. *BMC Evol Biol*. 2015; 15:259. doi:  
864 10.1186/s12862-015-0534-7
- 865 32. Gaiteri C, Ding Y, French B, Tseng GC, Sibille E. Review: Beyond modules and hubs –  
866 the potential of gene coexpression networks for investigating molecular mechanisms of  
867 complex brain disorders. *Genes, Brain & Behavior*. 2014; 13: 13 – 24. doi:  
868 10.1111/gbb.12106
- 869 33. Pita-Juañez Y, Altschuler G, Kariotis S, Wei W, Koler K, Green C, et al. The Pathway  
870 Coexpression Network: Revealing pathway relationships. *PLoS Comput. Biol*. 2018;  
871 14(3): e1006042. doi: 10.1371/journal.pcbi.1006042
- 872 34. Simkó GI, Gyurkó D, Veres DV, Nánási T, Csermely P. Network strategies to understand  
873 the aging process and help age-related drug design. *Genome Med*. 2009; 1(9):90. doi:  
874 10.1186/gm90
- 875 35. Witten TM. Introduction to the theory of aging networks. *Interdiscip Top Gerontol*. 2015;  
876 40:1-17. doi: 10.1159/000364922
- 877 36. Witten TM, Bonchev D. Predicting aging/longevity-related genes in the nematode  
878 *Caenorhabditis elegans*. *Chemistry & Diversity*. 2007; 4: 2639 – 2655. doi:  
879 10.1002/cbdv.200790216

- 880 37. Managbanag JR, Witten TM, Bonchev D, et al. Shortest-path network analysis is a useful  
881 approach toward identifying genetic determinants of longevity. PLoS ONE. 2008;  
882 3(11):e3802. doi: 10.1371/journal.pone.0003802
- 883 38. Ferrarini L, Bertelli L, Feala J, McCulloch AD, Paternostro G. A more efficient search  
884 strategy for aging genes based upon connectivity. Bioinformatics. 2005; 21 (3): 338 –  
885 348. doi: 10.1093/bioinformatics/bti004
- 886 39. Miraglia F, Vecchio F, Rossini PM. Physiological and pathological aging: a cortical  
887 connectivity analysis by graph theory model applied to brain network. Clinical  
888 Neurophysiology. 2015; Vol.126(1): pp.e2. doi: 10.1016/j.clinph.2014.10.026
- 889 40. Greer EL, Brunet A. Signaling networks in aging. J. Cell Sci. 2008; 121: 407 – 412. doi:  
890 10.1242/jcs.021519
- 891 41. Budovsky A, Abramovich A, Cohen R, Chalifa-Caspi V, Fraifeld V. Longevity network:  
892 Construction and implications. Mechanisms of Ageing and Development. 2007; 128: 117  
893 – 124. doi: 10.1016/j.mad.2006.11.018
- 894 42. Kriete A, Lechner M, Clearfield D, Bohmann D. Computational systems biology of  
895 aging. Systems Biology and Medicine. 2011; 3 (4): 414 – 428. doi: 10.1002/wsbm.126
- 896 43. Faisal FE, Milenkovi? T. Dynamic networks reveal key players in aging. Bioinformatics.  
897 2014; 30(12):1721-9. doi: 10.1093/bioinformatics/btu089
- 898 44. Xue H, Xian B, Dong D, Xia K, Zhu S, Zhang Z, et al. A modular network model of  
899 aging. Molecular Systems Biology. 2007; 3 (147). doi: 10.1038/msb4100189.
- 900 45. Leonov A, Titorenko VI. Critical Review: A network of interorganellar communications  
901 underlies cellular aging. IUBMB Life. 2013; 65 (8): 665 – 674. doi: 10.1002/iub.1183



- 902 46. Petkov PM, Ding Y, Cassell MA, Zhang W, Wagner G, Sargent EE, et al. An efficient  
903 SNP system for mouse genome scanning and elucidating strain relationships. *Genome*  
904 *Res.* 2004; 14(9). Doi: 10.1101/gr.2825804
- 905 47. Albert R, DasGupta B, Hegde R, Sivanathan GS, Gitter A, Gursoy G, et al.  
906 Computationally efficient measure of topological redundancy of biological and social  
907 networks. *Phys. Rev. E.* 2011; 84: 036117. doi: 10.1103/PhysRevE.84.036117
- 908 48. Isakov N & Altman A. PKC-theta-mediated signal delivery from the TCR/CD28 surface  
909 receptors. *Front Immunol.* 2012;3:273. doi: 10.3389/fimmu.2012.00273
- 910 49. Goronzy JJ, et al. Signaling pathways in aged T-cells – A reflection of T-cell  
911 differentiation, cell senescence and host environment. *Semin Immunol.* 2012;24(5):365-  
912 72. doi: 10.1016/j.smim.2012.04.003
- 913 50. Bavelas A. A mathematical model for group structures. *Human Organization.* 1948; 7:  
914 16-30. doi: 10.17730/humo.7.3.f4033344851gl053
- 915 51. Bonchev D. Complexity analysis of yeast proteome network. *Chemistry and Biodiversity.*  
916 2004; 1: 312 – 325. doi: 10.1002/cbdv.200490028
- 917 52. Ravasz E, Somera AL, Mongru DA, Oltavai ZN, Barabasi AL. Hierarchical organization  
918 of modularity in metabolic networks. *Science.* 2002; 297: 1551 – 1555. doi:  
919 10.1126/science.1073374
- 920 53. Lu X, Jain VV, Finn PW, Perkins, DL. Hubs in biological interaction networks exhibit  
921 low changes in expression in experimental asthma. *Molecular Systems Biology.* 2007; 3.  
922 doi: 10.1038/msb4100138.
- 923 54. Amaral LAN, Scala A, Barthelemy M, Stanley HE. Classes of behavior of small-world  
924 networks. *PNAS.* 2000; 97 (21): 11149. doi: 10.1073/pnas.200327197

- 925 55. Li D, Li J, Ouyang S, Wang J, Wu S, Wan P, et al. Protein interaction networks of  
926 *Saccharomyces cerevisiae*, *Caenorhabditis elegans* and *Drosophila melanogaster*: Large-  
927 scale organization and robustness. *Proteomics*. 2006; 6: 456 – 461. doi:  
928 10.1002/pmic.200500228
- 929 56. Rajarathinam T, Lin YH. Topological properties of protein-protein and metabolic  
930 interaction networks of *Drosophila melanogaster*. *Geno. Prot. Bioinfo*. 2006; 4 (2): 80 –  
931 89. doi: 10.1016/S1672-0229(06)60020-X
- 932 57. Jonsson PF, Bates PA. Global topological features of cancer proteins in the human  
933 interactome. *Bioinformatics*. 2006; 22 (18):2291 – 2297 doi:  
934 10.1093/bioinformatics/btl390.
- 935 58. Yu H, Kim PM, Sprecher E, Trifonov V, Gerstein M (2007) The importance of  
936 bottlenecks in protein networks: Correlation with gene essentiality and expression  
937 dynamics. *PLoS Comput Biol* 3(4): e59. doi: 10.1371/journal.pcbi.0030059
- 938 59. Scardoni G, Petterlini M, Laudanna C. Analyzing biological network parameters with  
939 CentiScaPe. *Bioinformatics*. 2009; 25 (21): 2857 – 2859. doi:  
940 10.1093/bioinformatics/btp517.
- 941 60. Qiao T, Shan W, Zhou C. How to identify the most powerful node in complex networks?  
942 A novel entropy centrality approach. *Entropy*. 2017; 19: 614. doi: 10.3390/e19110614.
- 943 61. Albert, R. Scale-free networks in biology. *J. Cell Sci*. 2005; 118: 4948 – 4957. doi:  
944 10.1242/jcs.02714
- 945 62. Keller EF. Revisiting “scale-free” networks. *BioEssays*. 2005; 27 (10): 1060 – 1068. doi:  
946 10.1002/bies.20294

- 947 63. Wuchty S. Scale-free behavior in protein domain networks. *Mol. Biol. Evol.* 2001; 18  
948 (9): 1694 – 1702. doi: 10.1093/oxfordjournals.molbev.a003957
- 949 64. Choromaski K, Matuszak M, MiKisz J. Scale-Free Graph with Preferential Attachment  
950 and Evolving Internal Vertex Structure. *Journal of Statistical Physics.* 2013; 151 (6):  
951 1175–1183. doi: 10.1007/s10955-013-0749-1
- 952 65. Fulop T, Dupuis G, Baehl S, Le Page A, Bourgade K, Frost E, et al. From inflamm-aging  
953 to immune-paralysis: a slippery slope during aging for immune-adaptation.  
954 *Biogerontology.* 2016; 17(1):147-57. doi: 10.1007/s10522-015-9615-7
- 955 66. Westera L, Van Hoeven V, Drylewicz J, Spierenburg G, van Velzen JF, de Boer RJ, et al.  
956 Lymphocyte maintenance during healthy aging requires no substantial alterations in  
957 cellular turnover. *Aging Cell.* 2015; 14(2):219-27. doi: 10.1111/accel.12311
- 958 67. Zhu J. T helper 2 (Th2) cell differentiation, type 2 innate lymphoid cell (ILC2)  
959 development and regulation of interleukin-4 (IL-4) and IL-13 production. *Cytokine.*  
960 2015; 75(1):14-24. doi: 10.1016/j.cyto.2015.05.010
- 961 68. Szklarczyk D, Franceschini A, Wyder S, Forslund K, Heller D, Huerta-Cepas J, et al.  
962 STRING v10: protein-protein interaction networks, integrated over the tree of life.  
963 *Nucleic Acids Res.* 2015;43:D447-52. doi: 10.1093/nar/gku1003
- 964 69. Revu S, Wu J, Henkel M, Rittenhouse N, Menk A, Delgoffe GM, et al. IL-23 and IL-1?  
965 Drive Human Th17 Cell Differentiation and Metabolic Reprogramming in Absence of  
966 CD28 Costimulation. *Cell Rep.* 2018; 22(10):2642-2653. doi:  
967 10.1016/j.celrep.2018.02.044

- 968 70. Carlson MR, Zhang B, Fang Z, Mischel PS, Horvath S, Nelson SF. Gene connectivity,  
969 function, and sequence conservation: predictions from modular yeast co-expression  
970 networks. *BMC Genomics*. 2006; 7, 40. doi: 10.1186/1471-2164-7-40
- 971 71. De rosa V, Procaccini C, Cali G, Pirozzi G, Fontana S, Zappacosta S, et al. A key role of  
972 leptin in the control of regulatory T-cell proliferation. *Immunity*. 2007; 26(2):241-55. doi:  
973 10.1016/j.immuni.2007.01.011
- 974 72. Cipolletta D. Adipose tissue-resident regulatory T-cells: phenotypic specialization,  
975 functions and therapeutic potential. *Immunology*. 2014; 142(4), 517-25. doi:  
976 10.1111/imm.12262
- 977 73. Wang M, Windgassen D, Papoutsakis ET. Comparative analysis of transcriptional  
978 profiling of CD3+, CD4+ and CD8+ T-cells identifies novel immune response players in  
979 T-cell activation. *BMC Genomics*. 2008; 9:225. doi: 10.1186/1471-2164-9-225
- 980 74. Hale JS, Boursalian T, Turk G, Fink, P. Thymic output in aged mice. *PNAS*. 2006; 103  
981 (22): 8447 – 8452. doi: 10.1073/pnas.0601040103
- 982 75. Weng NP, Araki Y, Subedi K. The molecular basis of the memory T-cell response:  
983 differential gene expression and its epigenetic regulation. *Nature Reviews Immunology*.  
984 2012; 12(4), 306-15. doi: 10.1038/nri3173.
- 985 76. Taylor J, Reynolds L, Hou L, Lohman K, Cui W, Kritchevsky S, et al. Transcriptomic  
986 profiles of aging in naïve and memory CD4+ cells from mice. *Immunity & ageing*. 2017;  
987 14, 15. doi:10.1186/s12979-017-0092-5.
- 988 77. Rane S, Hogan T, Seddon B, Yates AJ. Age is not just a number: Naive T-cells increase  
989 their ability to persist in the circulation over time. *PLoS Biol*. 2018; 16(4):e2003949. doi:  
990 10.1371/journal.pbio.2003949

- 991 78. Almeida L, Lochner M, Berod L, Sparwasser T. Metabolic pathways in T-cell activation  
992 and lineage differentiation. *Semin Immunol.* 2016; 28(5):514-524. doi:  
993 10.1016/j.smim.2016.10.009
- 994 79. Hudgins AD, Tazearslan C, Tare A, Zhu Y, Huffman D, Suh Y. Age- and Tissue-Specific  
995 Expression of Senescence Biomarkers in Mice. *Frontiers in Genetics.* 2018; 9, 59. doi:  
996 10.3389/fgene.2018.00059.

997

## 998 **Supporting Information**

999 **S1 Table. Summary of genes appearing in the age-related GCNs.** Genes with co-expression  
1000 relationships represented in either or both the old and young networks along with their human  
1001 ortholog and known functions.

1002 **S2 Table. Network of 2-month old mouse CD3+ splenocytes.** All co-expression relationships  
1003 appearing in the 2-month old mouse GCN are documented in this file.

1004 **S3 Table. Network of 22/24-month old mouse CD3+ splenocytes.** All co-expression  
1005 relationships appearing in the 22/24-month old mouse GCN are documented in this file.

1006 **S1 Fig. Heatmap representation of gene expression signature from splenic T-cells obtained**  
1007 **from young and old mice and across 3 mouse strains. The C2-5 signature with 130 selected**  
1008 **genes was identified from ICA/GSEA.** The C2-5 signature distinguishes young from old mice  
1009 (A), but also the genetic origins in young mice (B). The clustering of the 3 strains in young mice  
1010 (B) is, however, lost in old mice (C). Key genes where co-expression was observed are underlined  
1011 with TCR related genes (green boxes) co-stimulation molecules as CD28 (pink), CD69 an early

1012 activation marker and other markers revealed as centrality as the receptor for leptin (Lepr<sup>tl1</sup>  
1013 gene).

1014 **S2 Fig. Ingenuity Pathway Analysis of the C2-5 aging signature reveal altered gene**  
1015 **expression and pathways in old mice.** (signature score: 40, focus molecules: 23). In A) genes  
1016 with altered expression in the T-cells from old mice are involved in cellular development, cellular  
1017 growth and proliferation, hematological system development and function. Genes belonging to  
1018 TCR complex are underlined in green, CD28 downstream genes in orange, and those involved in  
1019 T-cell signal transduction in blue. B) For this C2-5 aging signature, the top disease and functions  
1020 are indicated.

1021 **S3 Fig. MCODE generated network clusters.** In this figure we display only the MCODE  
1022 generated clusters, not the full network structures. A total of four clusters were generated for the  
1023 young group (A), and six clusters generated for the old group (B).

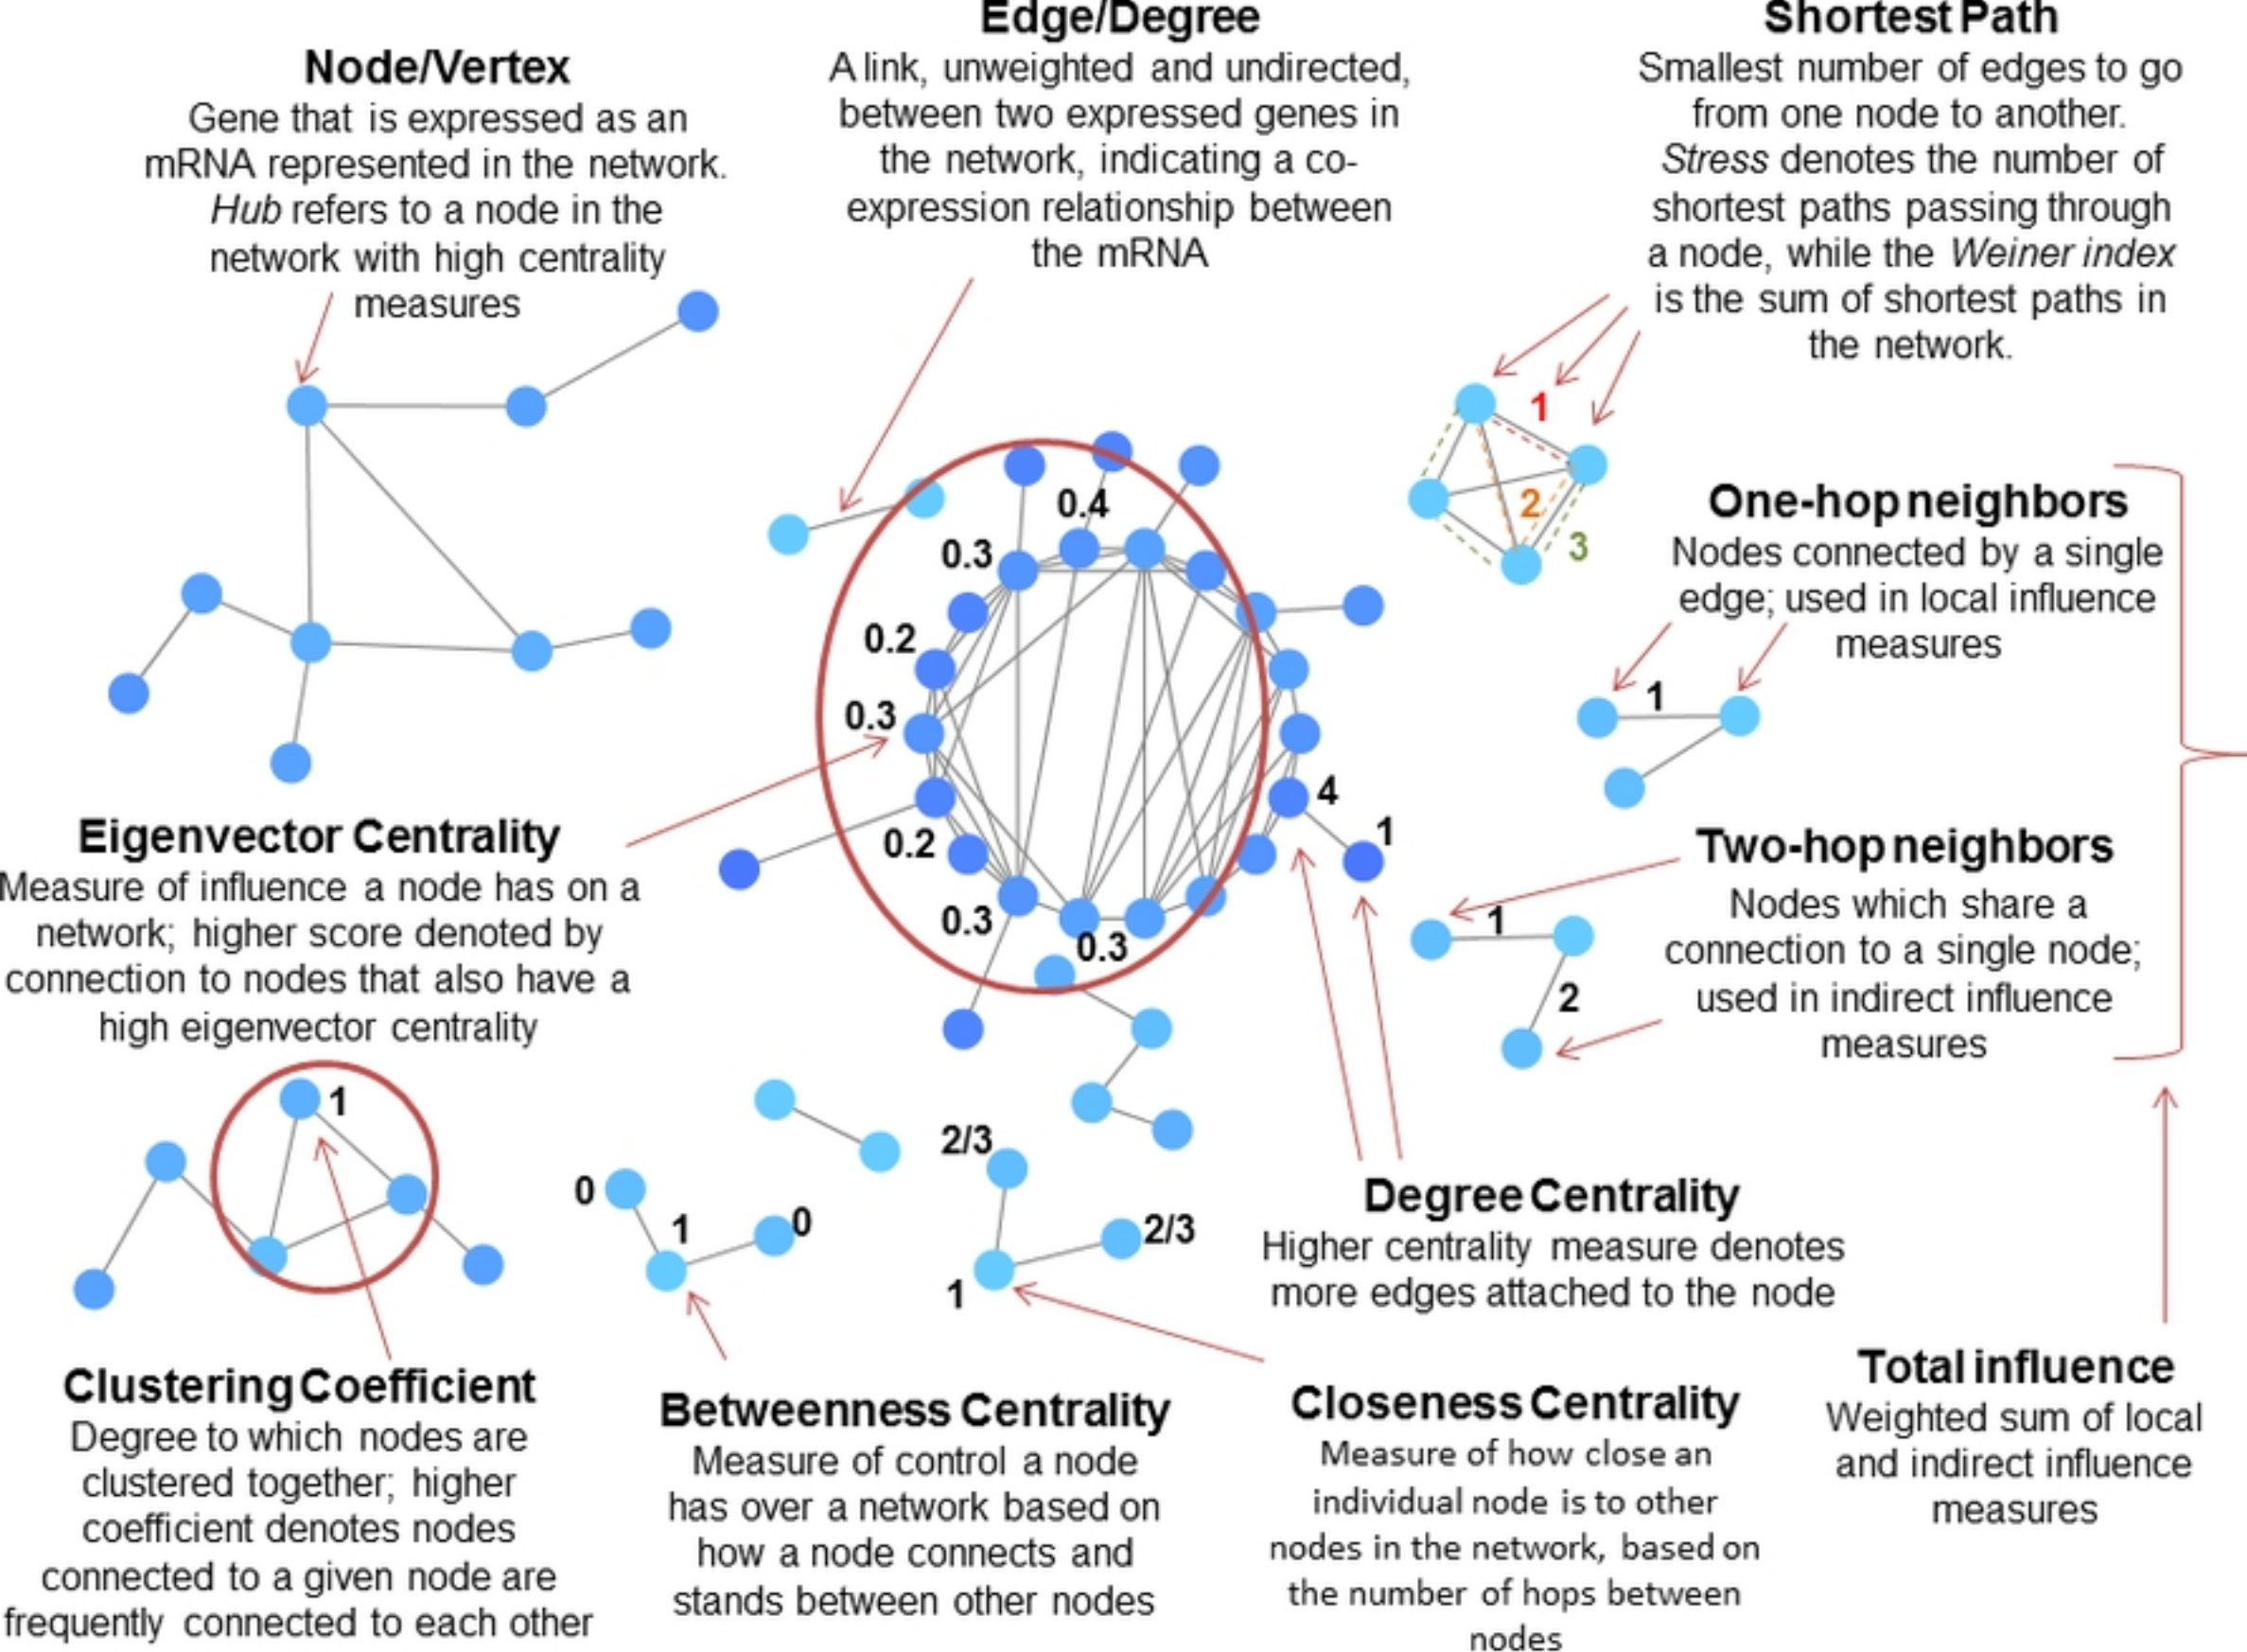

Figure 1

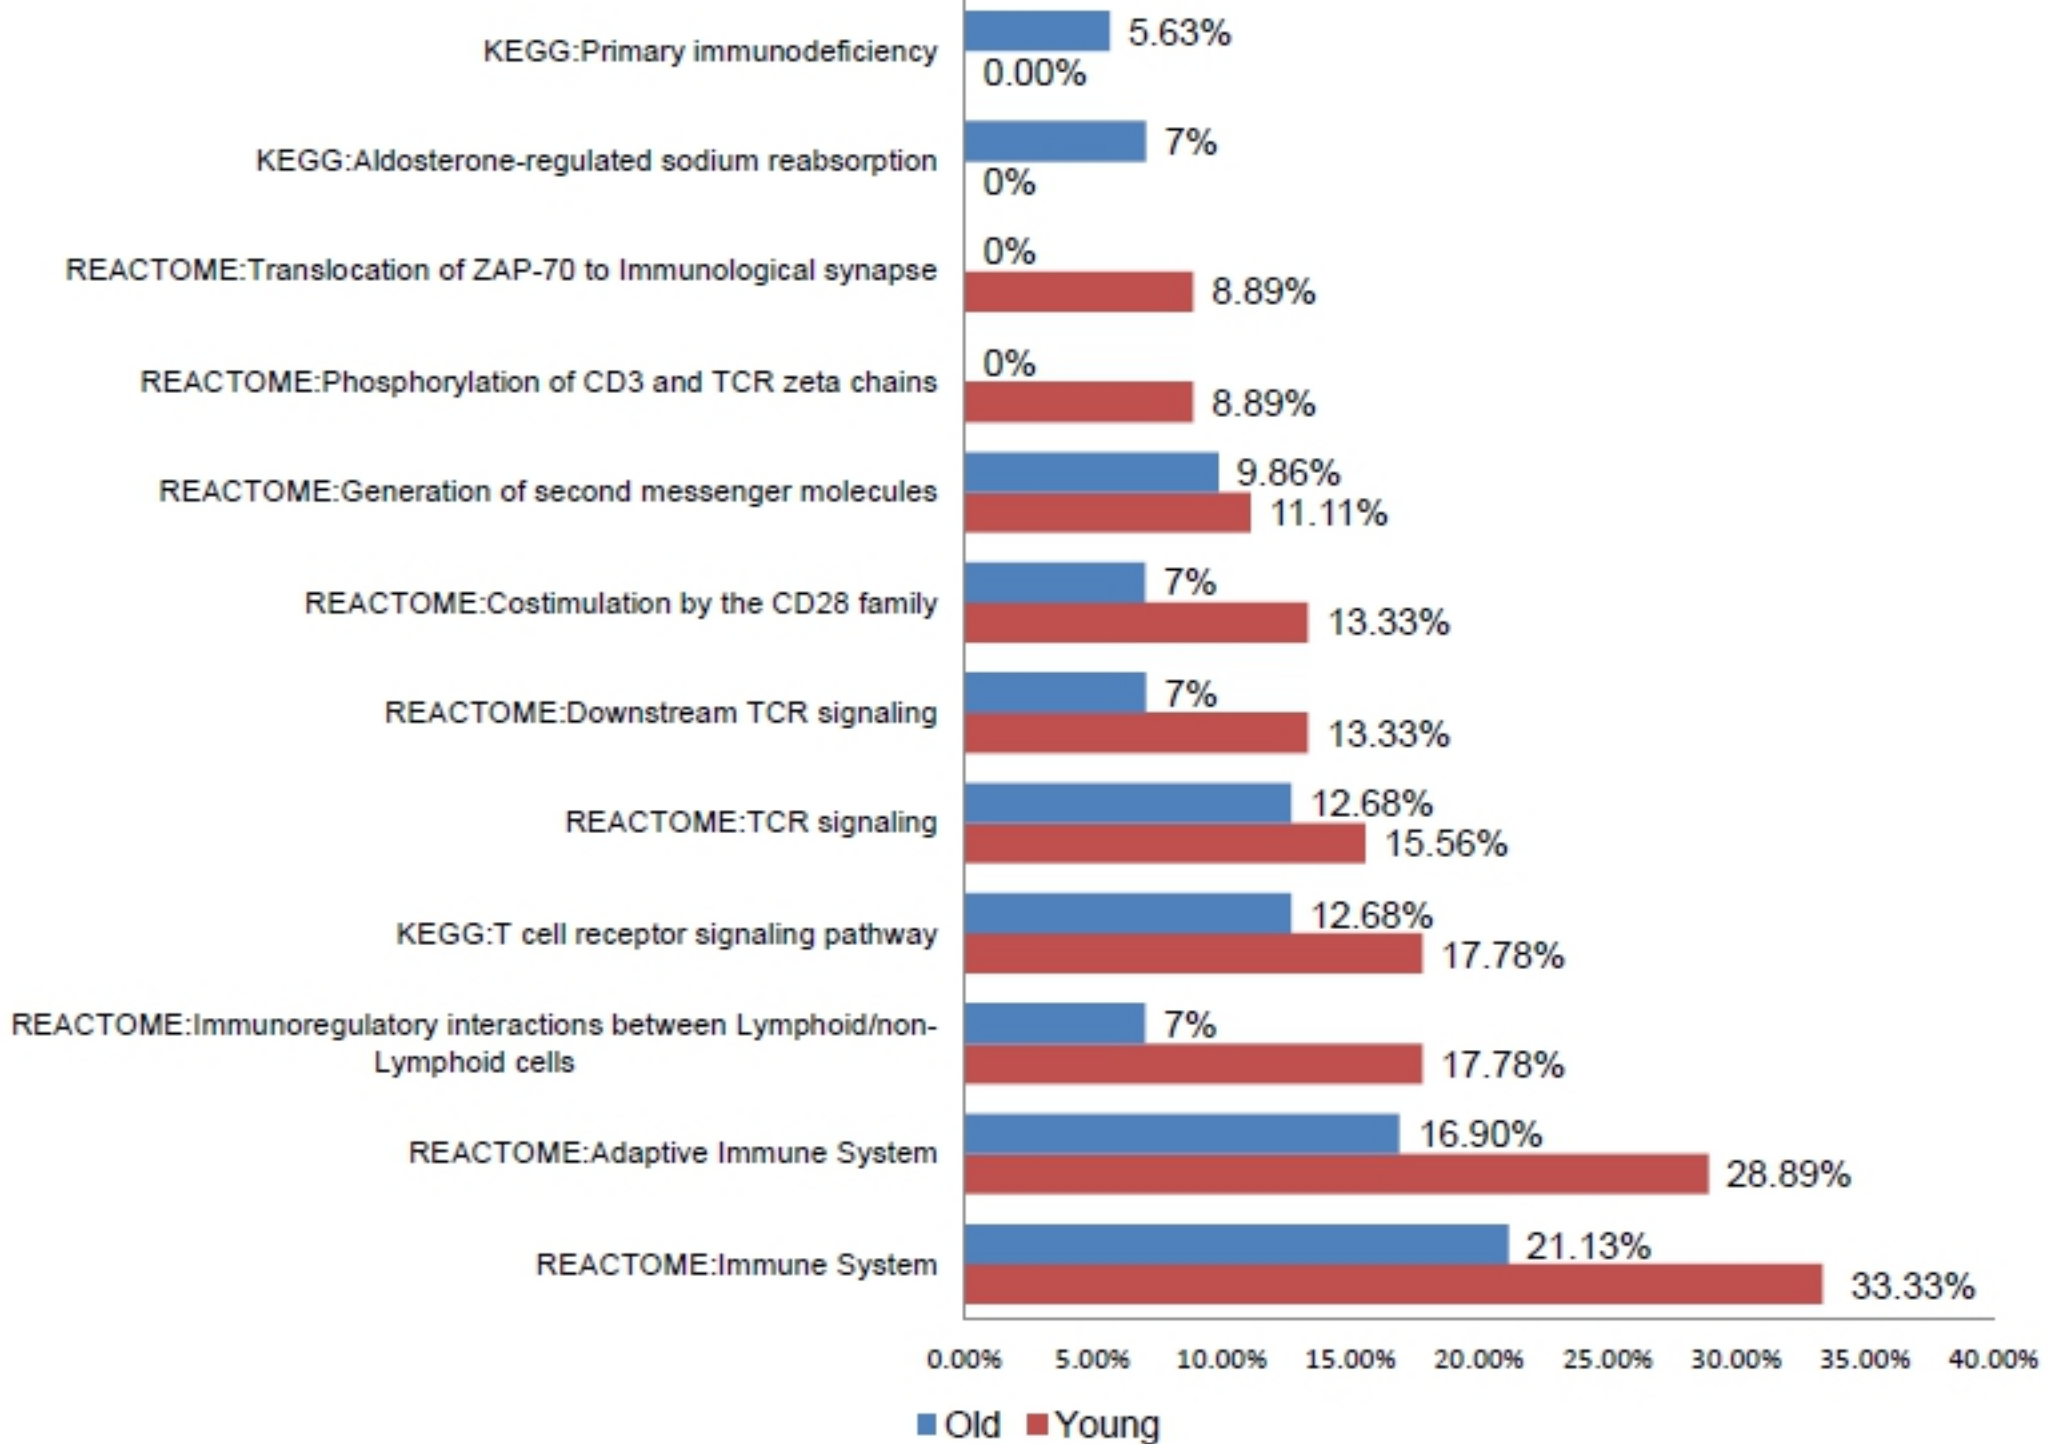

Figure2



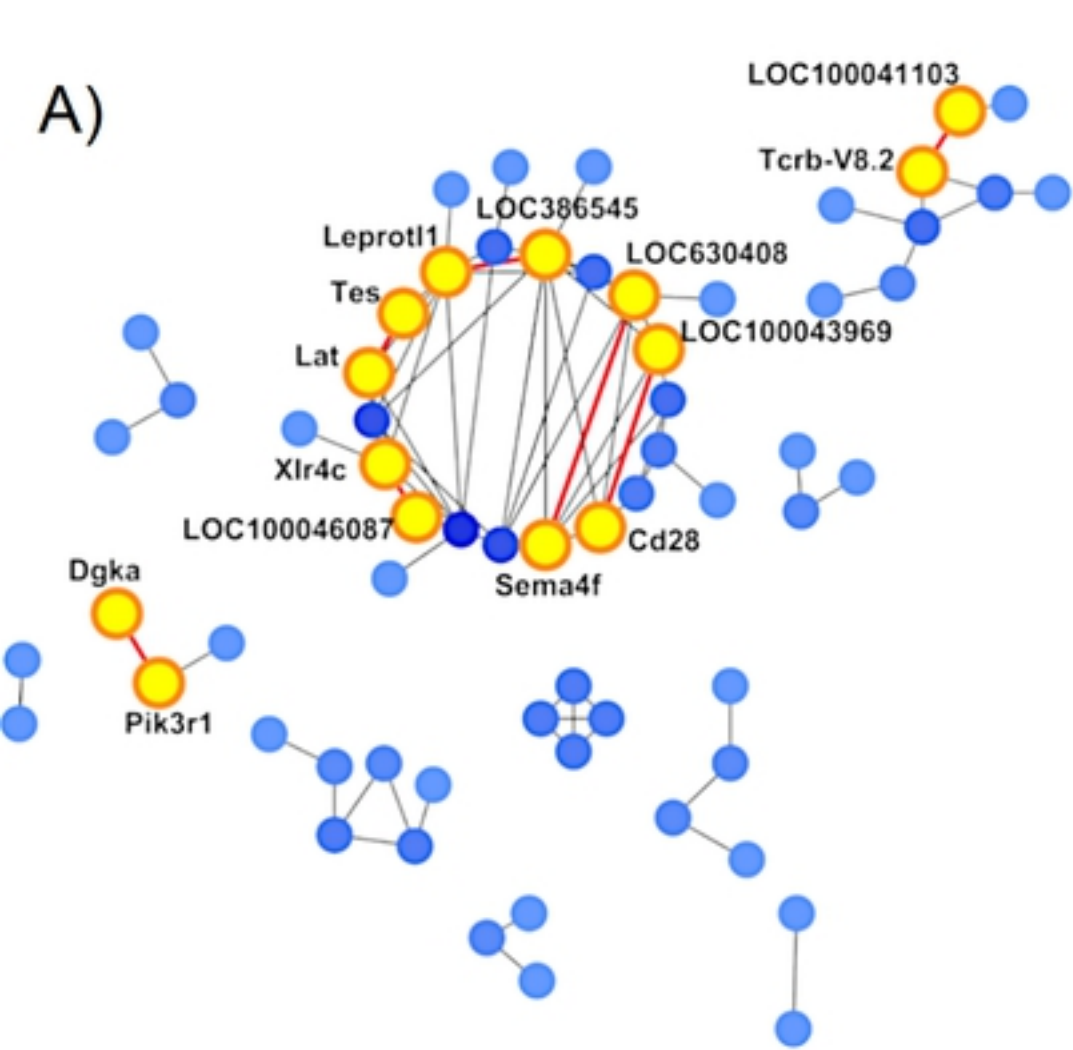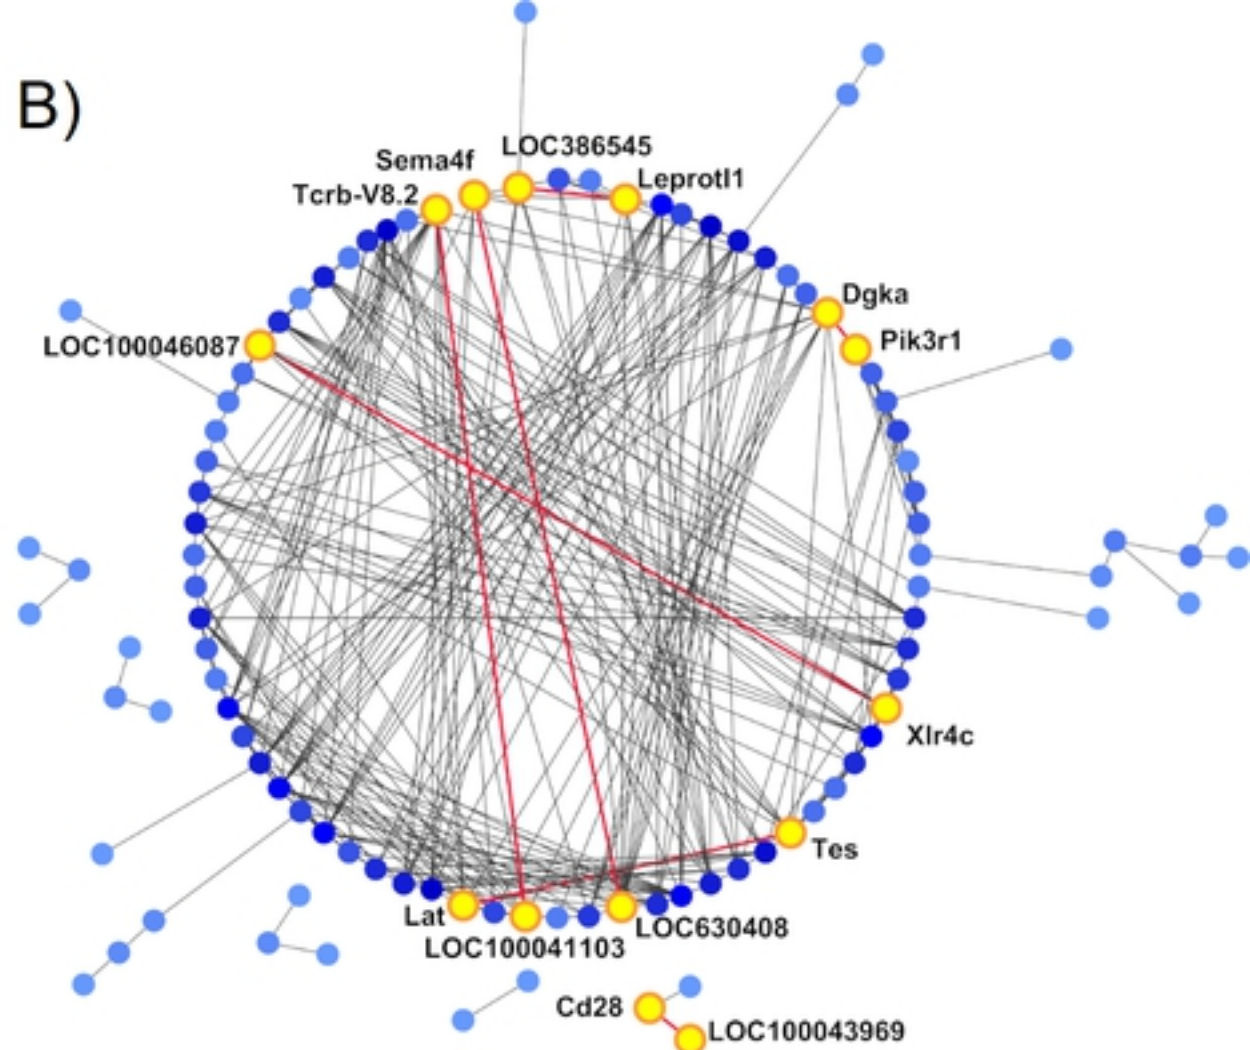

Figure3

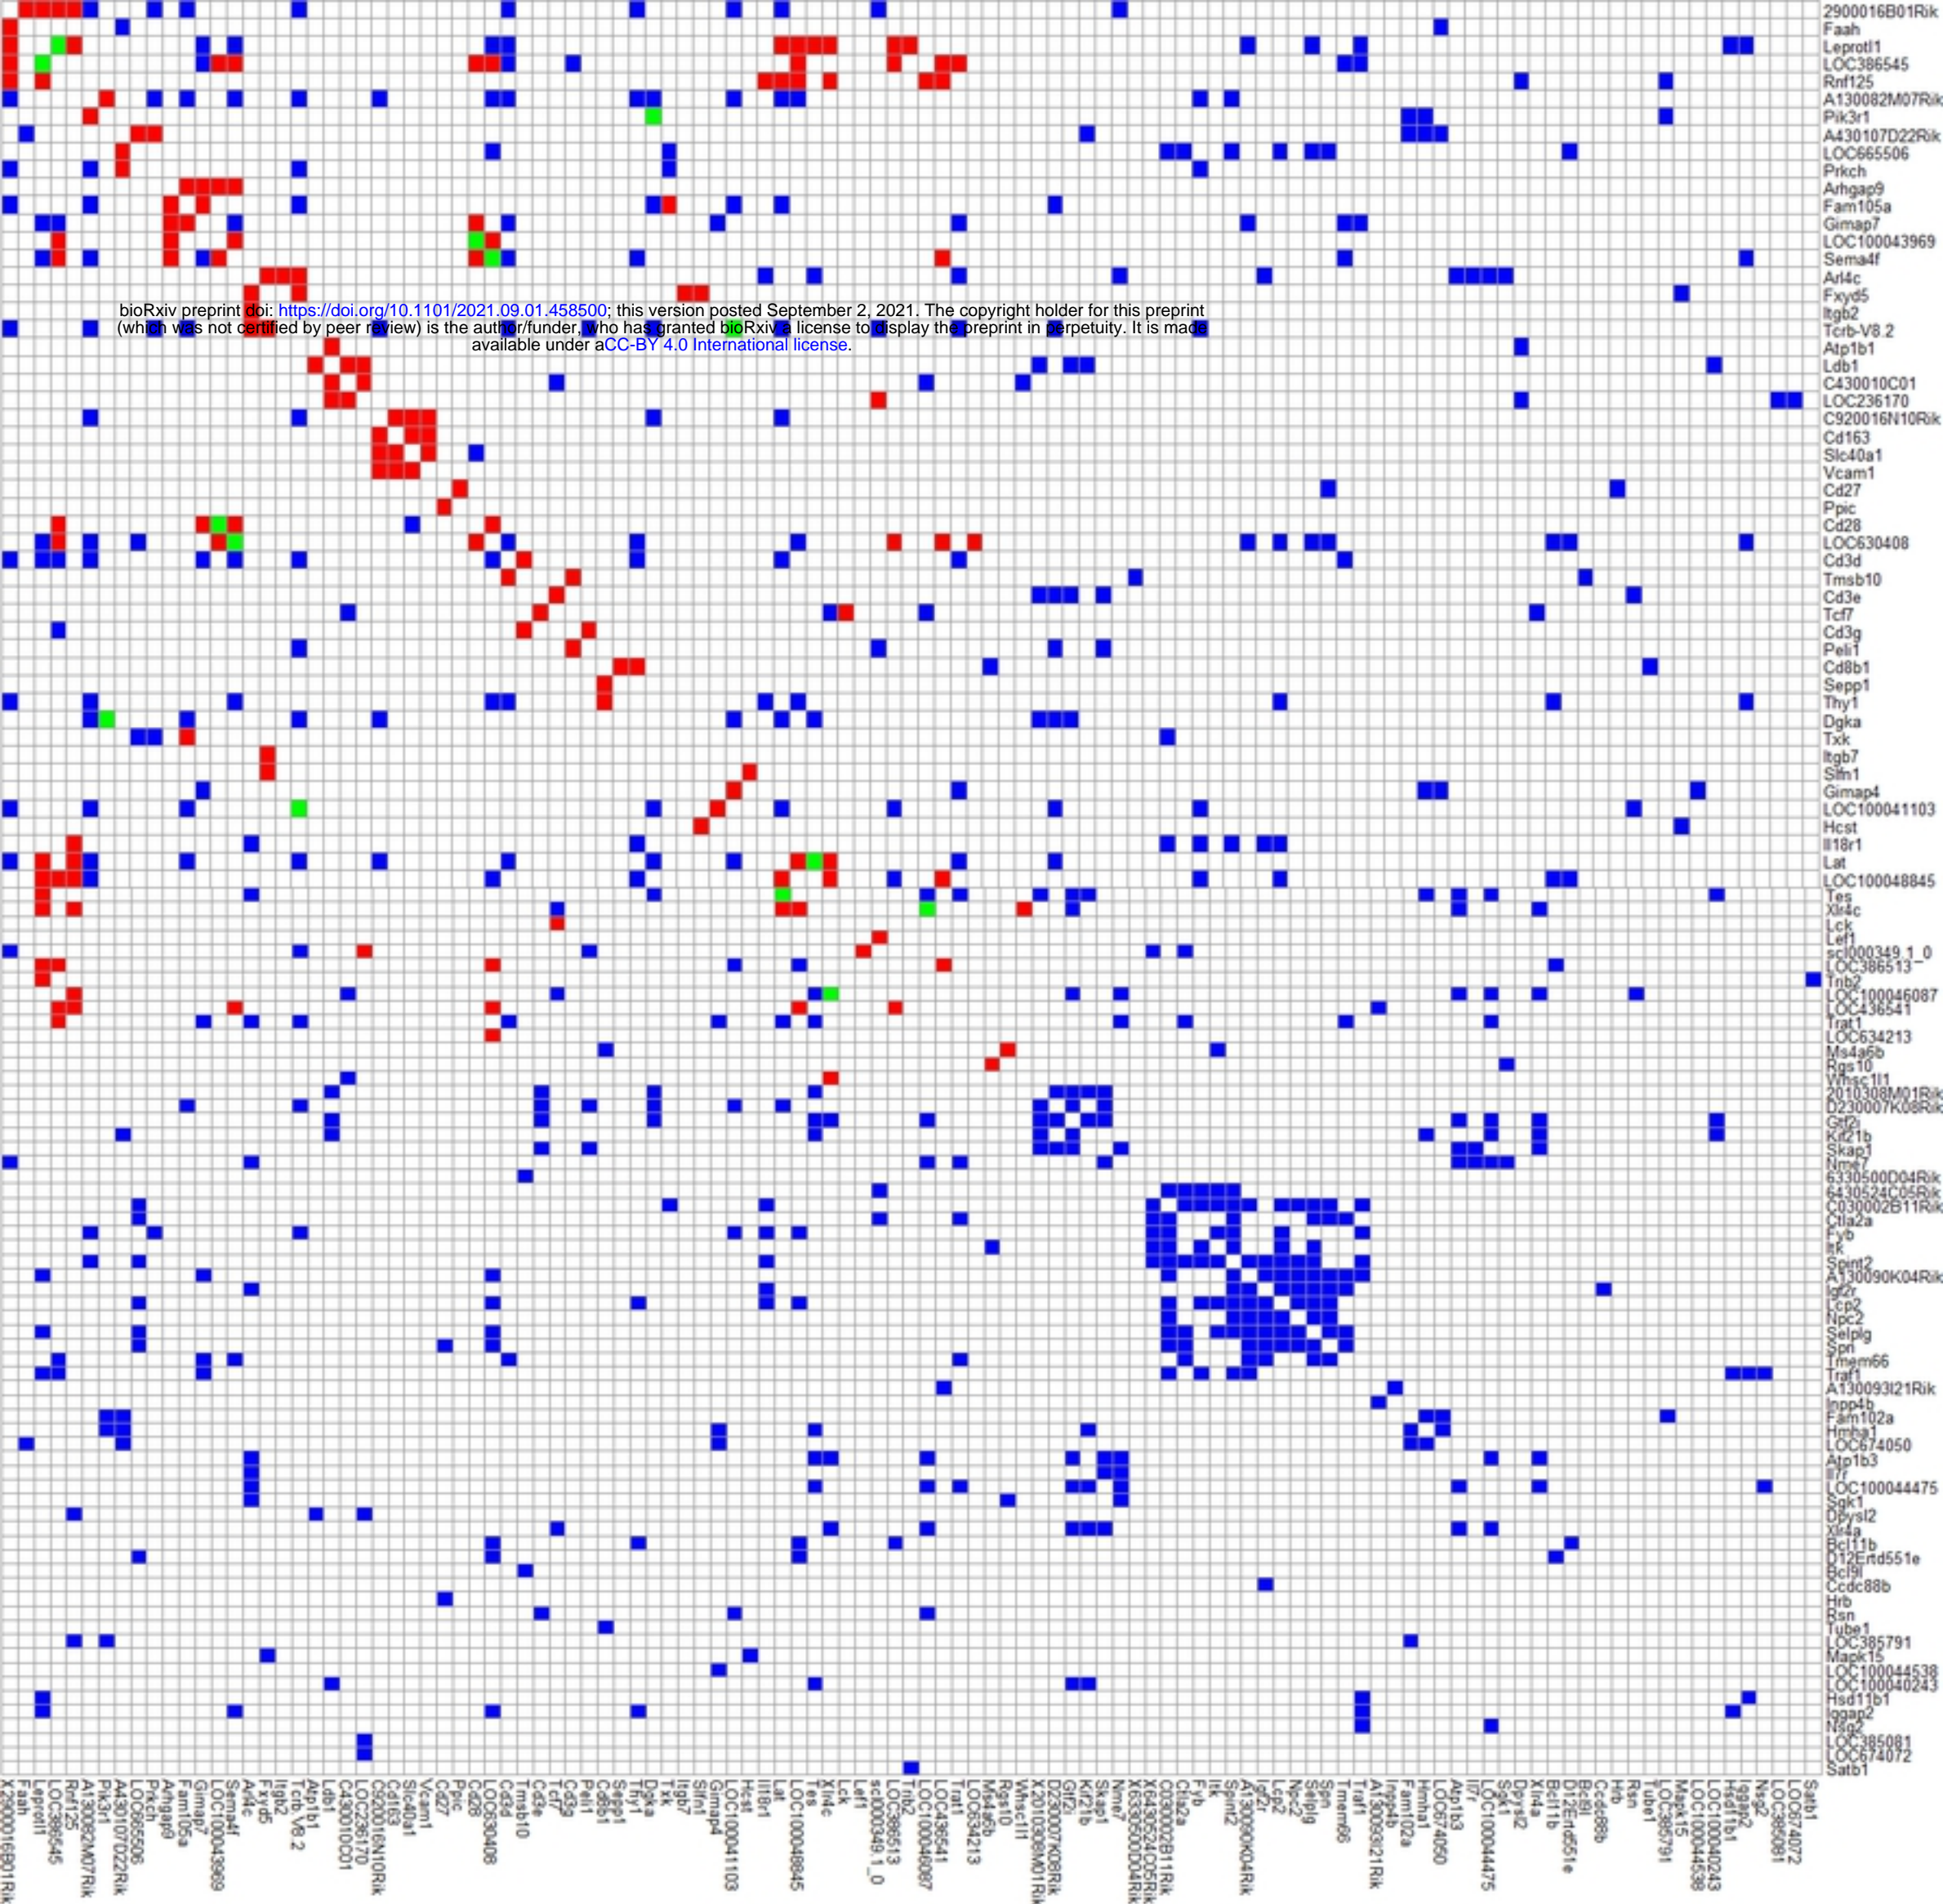

Figure4

bioRxiv preprint doi: <https://doi.org/10.1101/2021.09.01.458500>; this version posted September 2, 2021. The copyright holder for this preprint (which was not certified by peer review) is the author/funder, who has granted bioRxiv a license to display the preprint in perpetuity. It is made available under aCC-BY 4.0 International license.

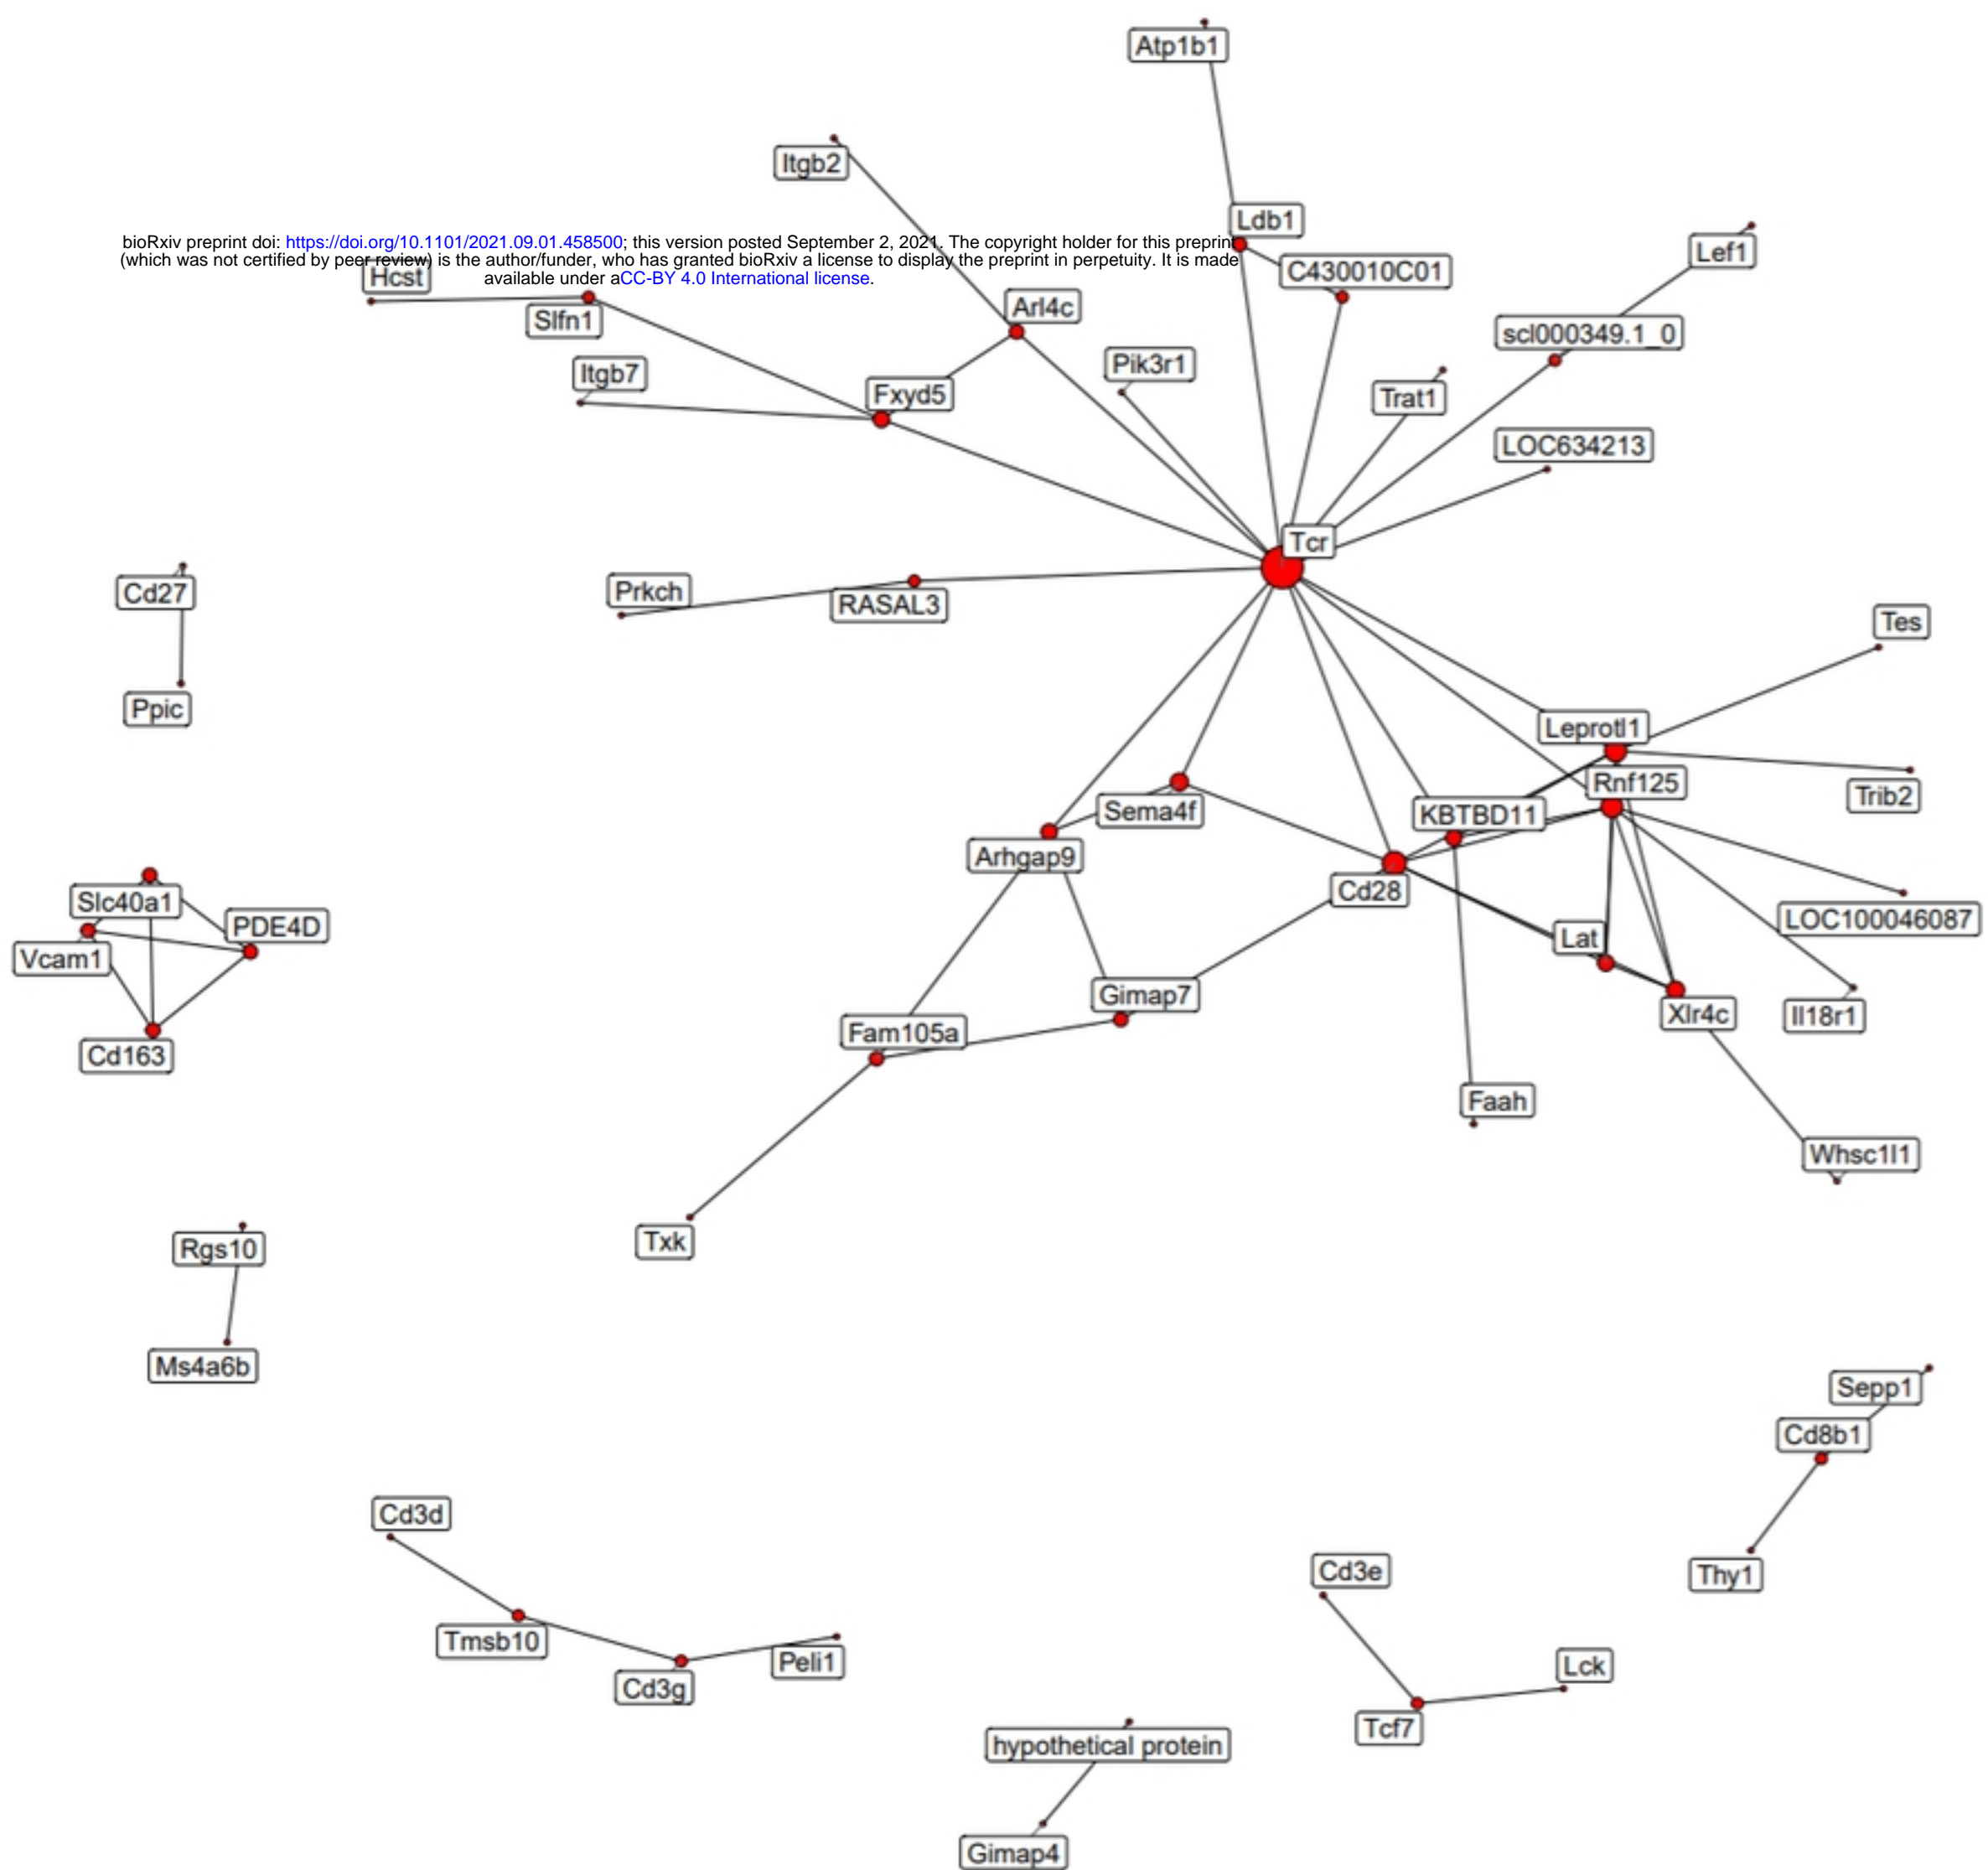

Figure5

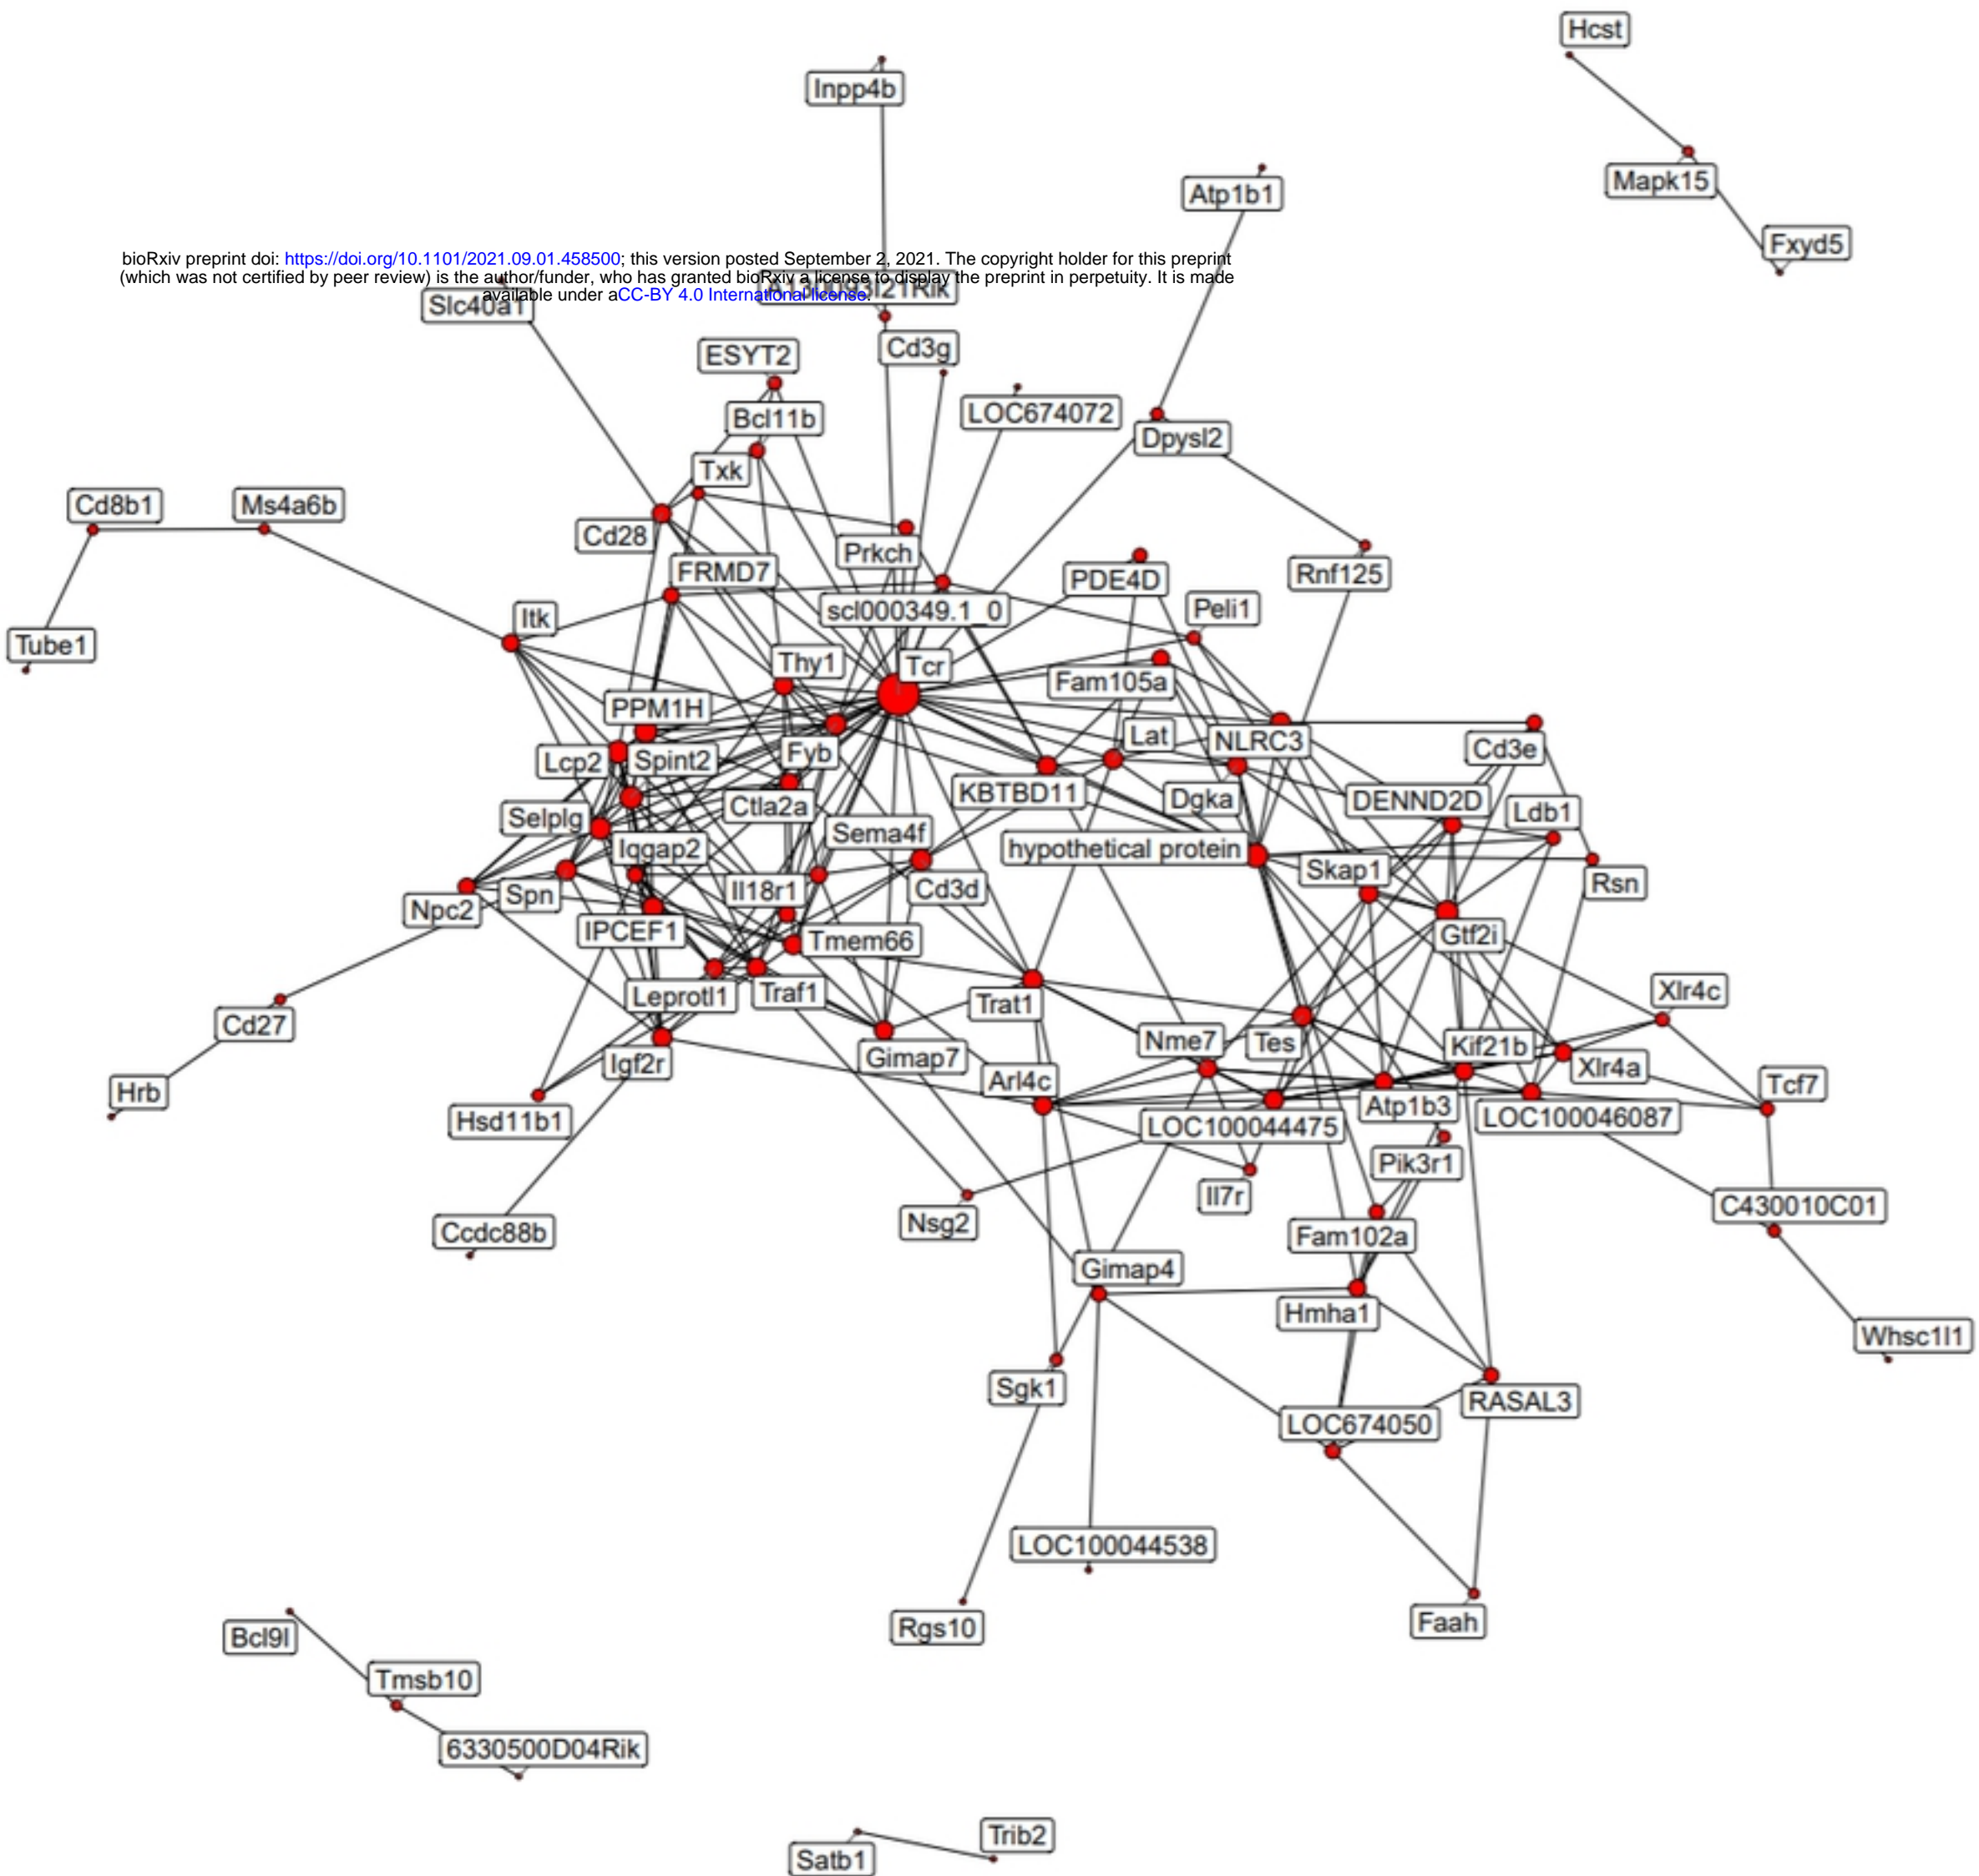

Figure6

# Degree vs. Clustering Coefficient

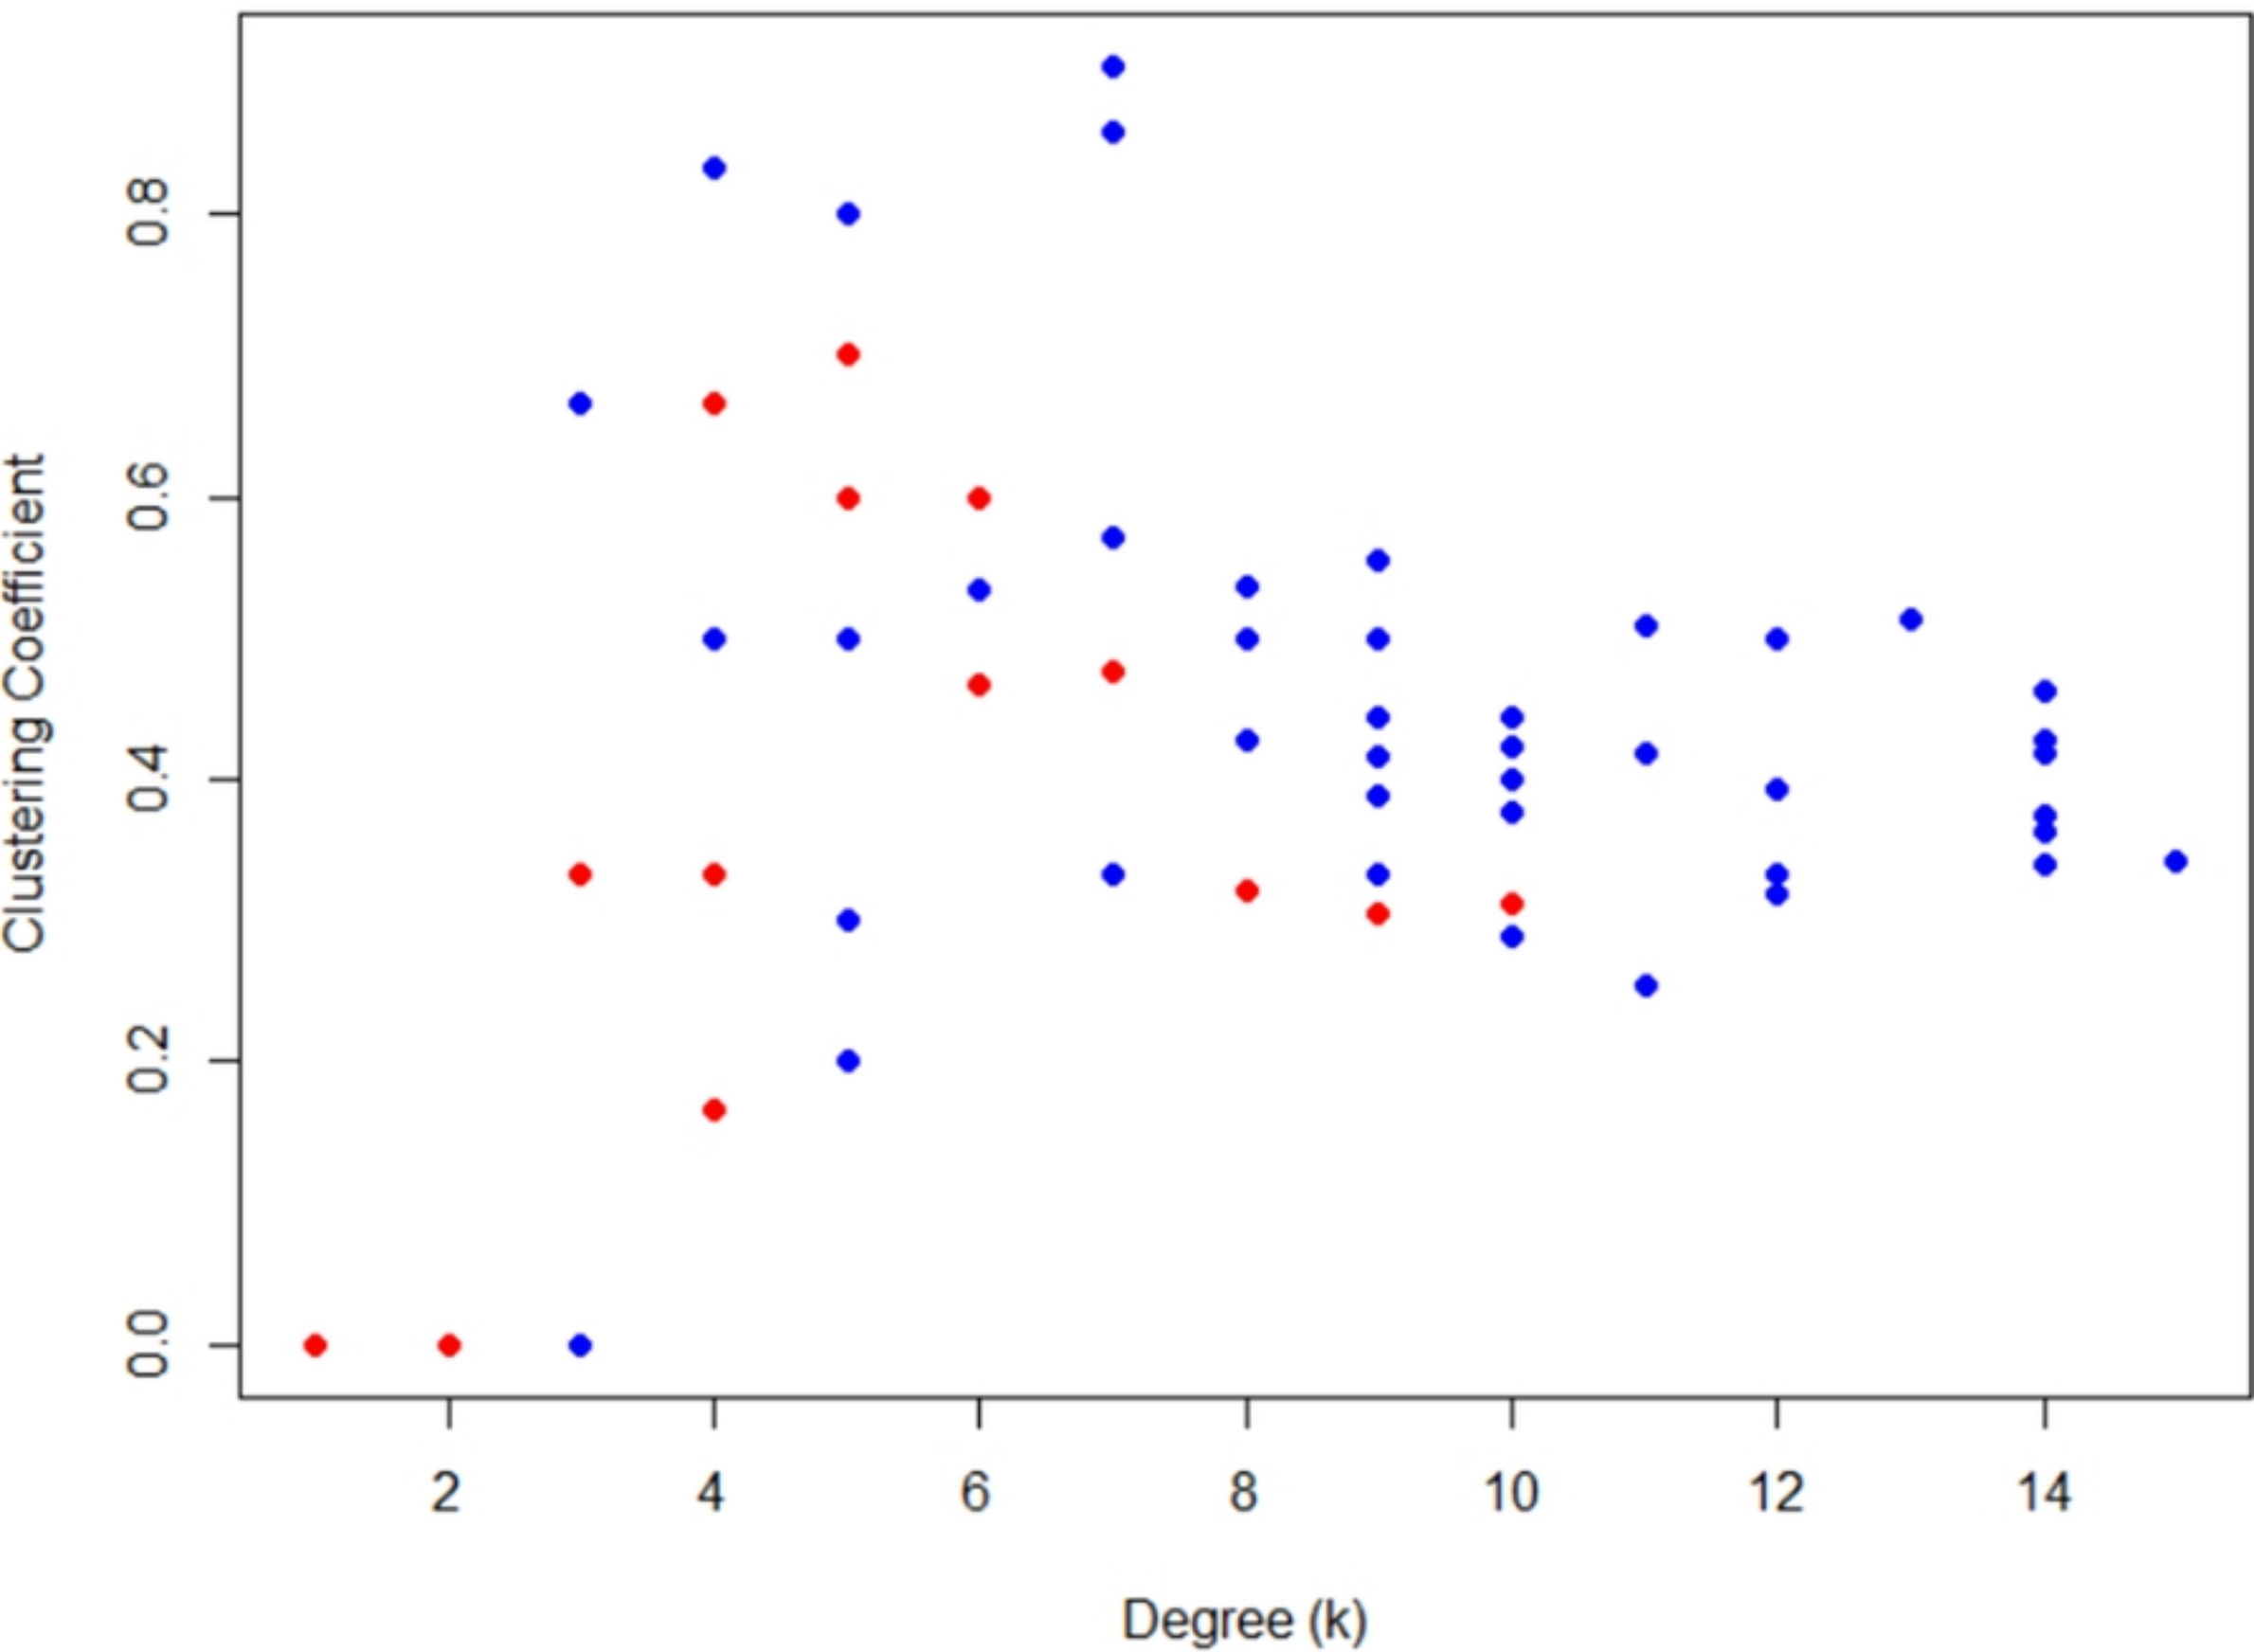

Figure7

Power Curve for 2mo CD3+ Splenocytes

A)

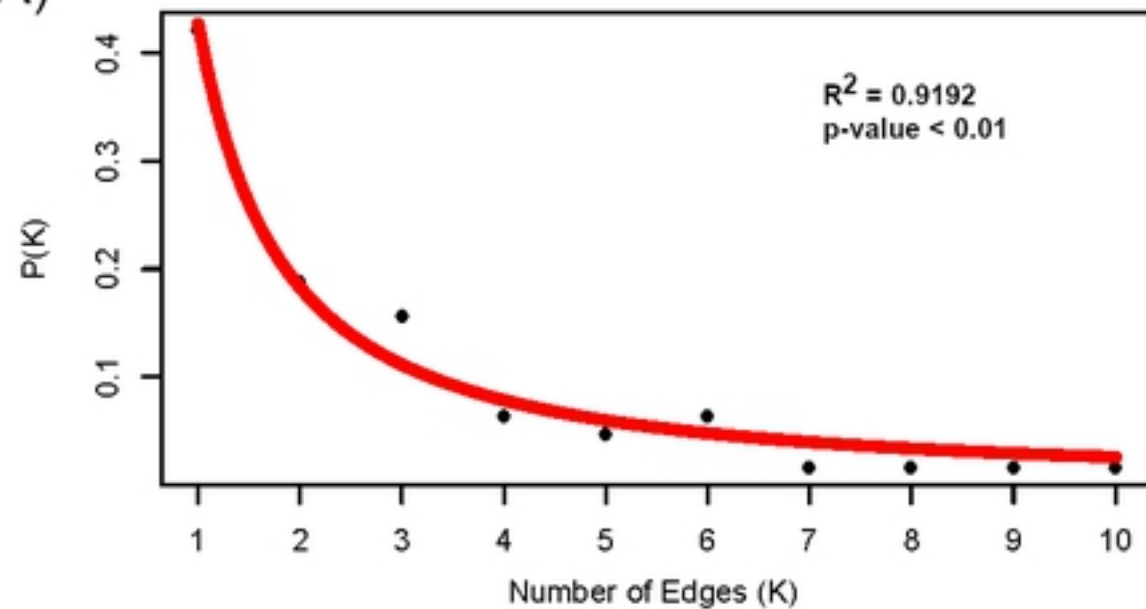

Power Curve for 22-24mo CD3+ Splenocytes

B)

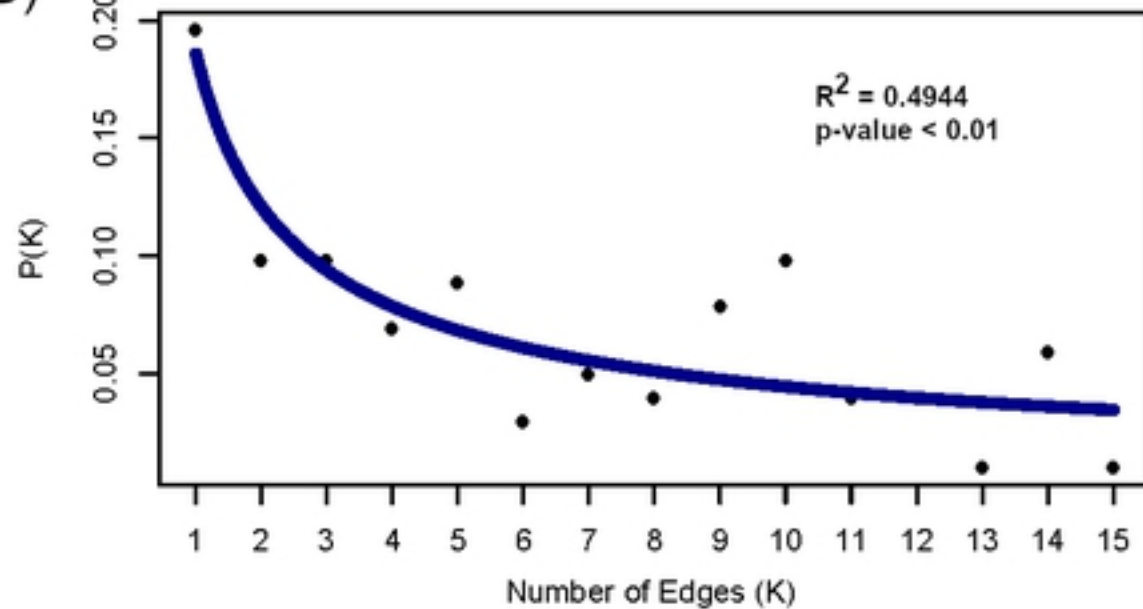

Figure8
